# Supplementary material for: Impact of leishmaniasis in women: a practical review with an update on my ISD-supported initiative to combat leishmaniasis in Yemen (ELYP)
Source: PubMed Central journal article supplement — Int J Womens Dermatol. 2016 Jun 16;2(3):93–101. doi: 10.1016/j.ijwd.2016.04.003 (PMC5418880; doi:10.1016/j.ijwd.2016.04.003), 2016-06-16

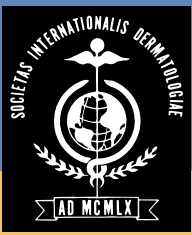

# ISD *Connection*

The Official Newsletter of the International Society of Dermatology Vol. 10, No. 1 • Winter 2016

## War in Yemen Not Deterring ISD Member from Aiding Leishmaniasis Patients

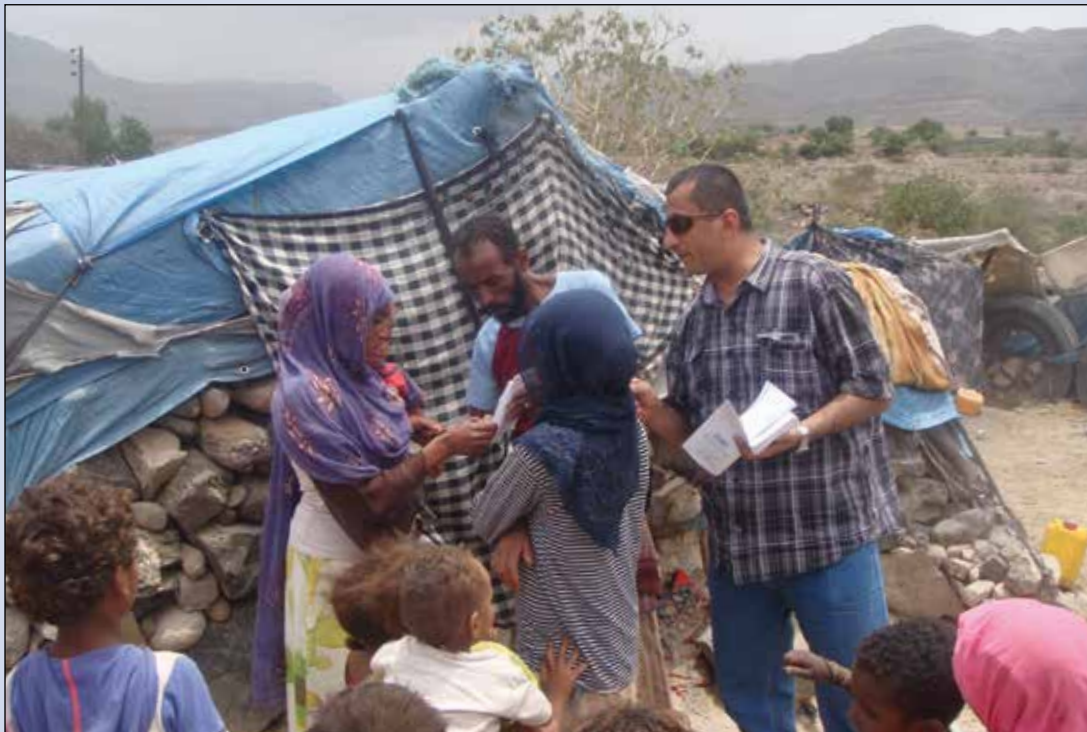

### *In This Issue*

|                                                                                         |     |                                                                                |     |                                  |    |
|-----------------------------------------------------------------------------------------|-----|--------------------------------------------------------------------------------|-----|----------------------------------|----|
| President's Letter . . . . .                                                            | 2   | Global Dermatology . . . . .                                                   | 6-7 | ISD Mentorship Program . . . . . | 10 |
| Secretary-General's Letter, Save the Date<br>for ISD at AAD, Dubai Derma 2016 . . . . . | 3   | Meet ISD Board Members . . . . .                                               | 8-9 | Membership Application . . . . . | 11 |
| Members Making a Difference . . . . .                                                   | 4-5 | Members in the News, 2016 Meetings Calendar,<br>Call for Nominations . . . . . | 9   | ISD Board of Directors . . . . . | 12 |

## PRESIDENT'S MESSAGE

### ISD: GETTING BIGGER AND BETTER

It's hard to believe that 777 days have quickly passed since I was elected the 14th ISD President in Delhi, India. How time flies! What have the seven members of the executive committee, eight standing committees, one task force and 35 board members done so far? With much inspiration and wisdom from our elders, we continuously increase our numbers globally, update them with our projects, meetings and congresses, contribute to education (*International Journal of Dermatology*) and award deserving members (Maria Duran fellowship, Global Education award, Community Dermatology award and Mentorship award).

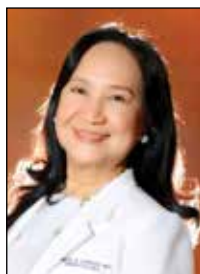

The current President-appointed Nominating Committee (NC) is the last but not least. With a distinctive task, its work begins as early as two years prior to the election and ends only when the process is over. It has the colossal responsibility of tendering the slate/names of our future leaders. ISD's election is a non-contested one, which simply means that there is no need to prepare multiple candidates for a single position -- making the NC's job a difficult one when multiple candidates apply for one position. Chairing this committee is Dr. Jorge Ocampo-Candiani (Mexico), with members Drs. Adebola Obunyi (Nigeria), Rekha Sheth (India), Suzanne Olbricht (US) and Luca Borradori (Switzerland).

In accordance with the bylaws of the ISD, the NC of the ISD invites applications from the general membership population for the following positions: President, Executive Vice President, Secretary-General, Treasurer, 10 Vice Presidents, 25 Board of Directors and Historian/Archivist -- all of whom are nominated members.

The NC will submit the slate for the vote of the membership at the XII International Congress of Dermatology (ICD) in Argentina in April 2017. The membership votes on the slate of nominees at the ICD's General Membership Meeting. With the 2017 ICD fast approaching, let's all get involved to ensure that ISD continues its long-standing tradition of electing dedicated, thoughtful leaders who will continue advancing the mission of the ISD.

Have a prosperous, successful and peaceful 2016!

*MABUHAY!*

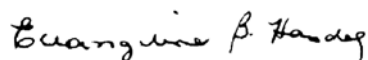

Evangelina B. Handog, MD  
ISD President

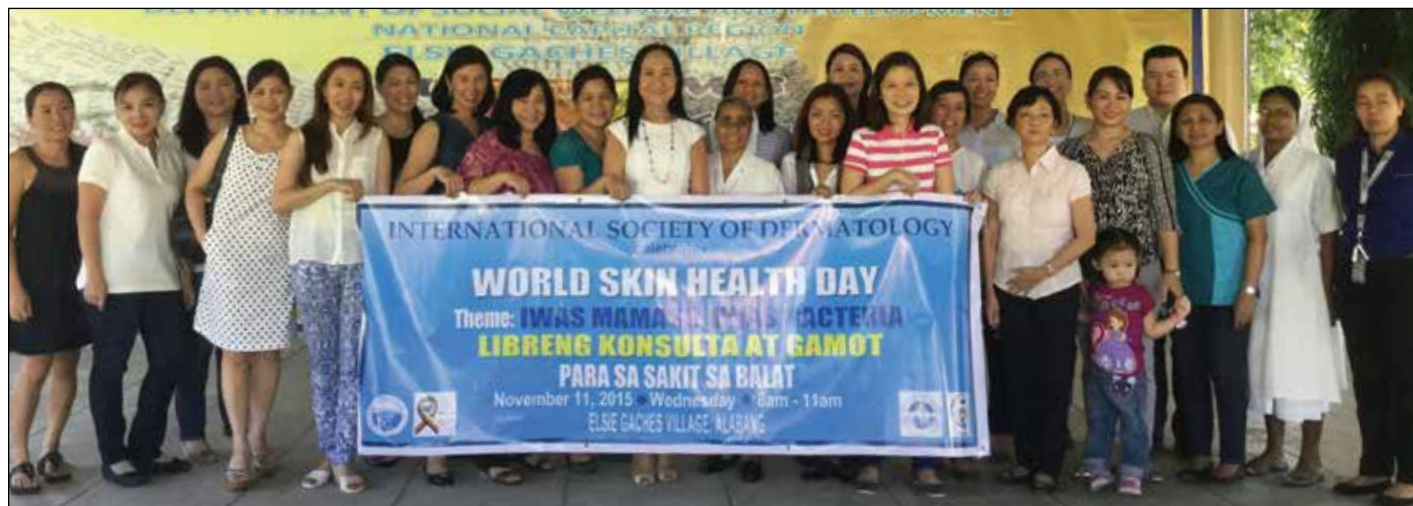

ISD President Dr. Evangelina Handog (behind banner in center in white dress) celebrates World Skin Health Day on November 11, 2015, on behalf of ISD and ILDS at Elsie Gaches Village in the Philippines. Dr. Handog serves as a volunteer dermatologist for Elsie Gaches Village, the only government center for mentally challenged persons -- most of them abandoned or orphaned children -- in the Philippines. An interview on Dr. Handog's involvement with Elsie Gaches Village was featured in the Fall 2012 issue of *ISD Connection* newsletter, which is posted online at [www.intsocderm.org](http://www.intsocderm.org).

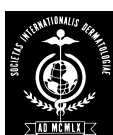

**International Society of Dermatology**  
2323 North State Street # 30 ■ Bunnell, FL 32110 USA  
Phone: (386) 437-4405  
Fax: (386) 437-4427  
E-mail: [info@intsocderm.org](mailto:info@intsocderm.org)  
Web site: [www.intsocderm.org](http://www.intsocderm.org)

Dedee Murrell, MBCh, MD,  
FACD (Australia/UK)  
Chair, Communications  
Committee  
Evangelina B. Handog, MD  
(Philippines)  
Editorial Advisor  
Nellie Konnikov, MD  
(US/Russia)  
Editorial Advisor

Maria Juliet Macarayo, MD  
(Philippines)  
Editor  
Esperanza Welsh, MD (Mexico)  
Associate Editor  
Karen Sideris (United States)  
Managing Editor  
Cindy Froehlich (United States)  
Executive Director

*ISD Connection* Winter 2016 ■ Vol. 10, No. 1

Copyright © 2016 ISD. All rights reserved.

## FROM THE SECRETARY-GENERAL

Dear friends and colleagues,

It is my sincere hope that New Year 2016 brings happiness, stability, and peace to the world.

In this spirit, I truly believe that the International Society of Dermatology carries unparalleled value to the world community. As an international network of dermatologists, we thrive on improving skin care for all, sharing the latest knowledge and technology, and maintaining the grass-root network of dermatologists worldwide.

I am pleased to report to you the overwhelming success of our last year's regional meetings, judged by the robust feedback from participants and attendees.

However, once the bar is raised, we, the Executive Board, have to work even harder to maintain the level of excellence in education and ability to support our young, talented, and motivated dermatologists in the upcoming years. This is one of the central missions of ISD, and the one that is near and dear to my heart: nurture future leaders from the underserved, underfunded, and most-needed corners of the world.

With the adoption of my motto "*Dermatologists Without Borders*" and the thaw in U.S.-Cuban relations, a few ISD members are about to leave for the very first meeting with Cuban dermatologists in

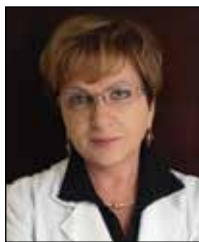

Havana right before the American Academy of Dermatology (AAD) 2016 Annual Meeting in Washington, D.C.

The planning process for this historic meeting started a year ago by our EC member and treasurer, Dr. George Reizner (US), who personally contacted the president of the Cuban Society with a proposal of this mutually rewarding exploratory visit and an establishment of a bridge between our societies.

I am enthusiastically inviting all of you, my friends, to our dashing annual ISD party on Monday night, March 7, at the AAD in Washington. You will have plenty of opportunity for networking with your colleagues, an exchange and update on the latest news, especially the much-anticipated 5th Continental Congress of Dermatology (CCD) in Dubai in April 2016. The motto of this meeting, "*Skin Health is our Concern*", speaks to the unique focus on dermatology, expert skin care and laser technologies. It is sure to be a top-notch educational and cultural highlight of the year!

In the meantime, stay tuned and follow ISD on our Facebook page and website.

Do vstrechi! See you soon!

*Nellie Konnikov, M.D.*

Nellie Konnikov, MD  
ISD Secretary-General

International Society of Dermatology Reception • March 7, 2016 • Washington, DC

**Save the Date**  
**to Dance Around the World**  
**with ISD at AAD**

**ISD Reception**  
**at the 2016 AAD Annual Meeting**  
**in Washington, D.C.**

**Monday, March 7, 2016 • 5:30 PM – 7:30 PM**  
**Marriott Marquis • Capitol/Congress Room**

Join your ISD colleagues and welcome new members for the annual ISD reception. This year, we're celebrating Gaucho Days and Arabian Nights in anticipation of the upcoming 5th CCD in Dubai and the XII ICD in Argentina. It's a great chance to have fun while learning about all the exciting ISD activities underway.

**RSVP today at [www.intsocderm.org](http://www.intsocderm.org).**  
**See you there!**

Under the Patronage of  
**H. H. Sheikh Hamdan Bin Rashid Al Maktoum**  
Deputy Ruler of Dubai, Minister of Finance  
President of the Dubai Health Authority

**16<sup>th</sup> Dubai World Dermatology and Laser Conference & Exhibition**

**Dubai Derma**  
Skin Health is Our Concern **2016**

in conjunction with the  
**5<sup>th</sup> Continental Congress of Dermatology**

**12-14 April**  
Dubai International Convention & Exhibition Centre

**Discover the Latest Trends On!**

- Cases • Common Dermatitis • Controversies
- Cosmetic Pharma • Filler & Botox • Lasers
- Meet the Experts • Pediatric Derm
- Psooriasis • Skin Surgery • Therapies • Vitiligo
- Vitiligo Therapies • What's New In Therapy

**CONNECT** with 10000+ Dermatologists, Laser Specialists and Aesthetic Surgeons  
**SOURCE** cutting edge products from 700+ brands  
**GET AHEAD** of the competition in the booming skin care and aesthetic laser market  
**LEARN** from over 110 world-renowned speakers  
**EARN** more than 40 CME points

**Stay Connected**

Dubai World Dermatology and Laser Conference and Exhibition  
@dubaiderma  
dubaiderma  
Dubai Derma

**www.dubaiderma.com**

Organised by: **INDEX**  
In Cooperation with: **ISD**  
Supported by: **GOVERNMENT OF DUBAI** and **DUBAI HEALTH AUTHORITY**

**INDEX® Conferences & Exhibitions Organisation Est.**  
Dubai Healthcare City, Bin Sina Medical Complex #27, Block B, Office 203 | P.O. Box: 13636, Dubai, UAE  
Tel: +971 4 3624717 | Fax: +971 4 3624718 | e-mail: [info@dubaiderma.com](mailto:info@dubaiderma.com)

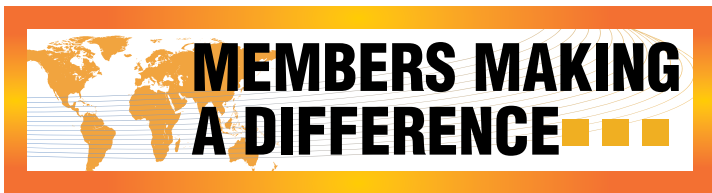

## ISD Member Fights for Leishmaniasis Patients Amidst War in Yemen

In the span of nearly three years since ISD member Dr. Mohamed Al-Kamel's (Yemen) Regional Leishmaniasis Control Center (RLCC) project was featured in the Summer 2013 ISD newsletter, a lot has changed in Yemen. The ongoing war has taken a toll on everyday life -- displacing countless people and at times making basic necessities scarce.

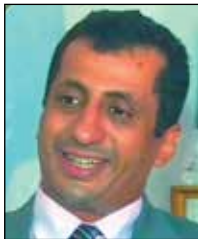

Dr. Mohamed A. Al-Kamel

Here, Dr. Al-Kamel, RLCC chairman and founder, shares his experience and challenges in continuing needed medical care for those suffering from leishmaniasis in Yemen.

**Since you last updated us on the RLCC in Yemen in 2013, war has ravaged your region of the world. How has the war affected your efforts to help those suffering from leishmaniasis?**

The ongoing war in Yemen (started in March 2015) forced us to close the head RLCC unit in Sana'a for three months (April-June 2015), restricted our ability to evoke more field campaigns, and deprived some leishmaniasis victims -- specifically in the southern and eastern regions -- from reaching our centers.

It is observed that the war pushed millions of big city inhabitants out to villages, where leishmaniasis is endemic. Currently, increased numbers of leishmaniasis cases -- in-between who were considered urban inhabitants before the war -- are seen. I noticed that wounds in injured fighters represent easy meals for leishmaniasis vectors (female sand flies)!

Given the magnificent growth of dogs, rodents, and flies in the cities, I expect a future increase in leishmaniasis among the urban populations who were considered the lowest risk groups.

Despite the scarcity of resources, war and instability, my "Eradication of Leishmaniasis from Yemen Project" (ELYP) has made a difference in the leishmaniasis situation in Yemen. We have addressed the magnitude of the disorder and eradicated it from some areas in central Yemen. We have dealt with and improved its alarming prevalence among children and women, being the neglected and highest risk groups. Issues associated with poor access to proper drugs were solved. Our cause has attracted local and global attention to these problematic issues.

In October 2014, ISD executive committee members successfully lobbied Stiefel/GSK pharmaceutical to provide a generous supply of anti-leishmaniasis medication (Pentostam® injections) to this project over three years. While ISD requested 100 vials annually for three years, Stiefel/GSK decided to donate three times the requested amount -- donating 300 vials annually. This donation has enabled

leishmaniasis patients to freely receive medicine they otherwise would not have been able to afford, reducing their mortality and morbidity, and minimizing the extensive impact the socio-aesthetic stigma has on their lives.

Thanks to ELYP, ISD, AAD and ILDS, awareness of the disease that was near zero has been significantly increased in the community. Now, most physicians in the rural and urban health units are aware and interested in the disease and have at least the essential knowledge on how to diagnose, manage and refer leishmaniasis patients. As a result, the research capabilities of leishmaniasis in Yemen have improved.

**How many leishmaniasis patients is your organization treating each month? What treatments are you currently using, and has the war affected your medical supplies in any way?**

RLCC welcomes an average of 67-100 leishmaniasis patients monthly, most of whom are poor rural women and children who receive free examination, medicine and educational newsletter. Currently, only Pentostam® injections are available freely to our patients.

Unfortunately, the current war has delayed RLCC receiving the second quantity of GSK/Stiefel medicine donation on time.

**Have you noticed an increase in any other dermatological conditions over the past three years?**

As to visceral leishmaniasis, yes. There was an alarming increase, as per our records, in the incidence -- from 3% in 2013 to 5.14% by the end of 2015. Noticeable also was the significant increase in skin malignancies and auto-immune skin disorders over the past three years.

**How can ISD members help or contribute to your program? What are your greatest needs?**

The next phase of partnership with project ELYP should include, in addition to additional medicine donation, the possibility of medical staff training, molecular diagnosis, clinical research sponsorships, disfigured women rehabilitation program, and improvement of the access to our services for populations living in remote areas.

Our patients are in imperative need to other alternative substitutes, such as meglumine antimonite (Glucantime®), amphotericin B, and paromomycin for those who cannot tolerate sodium stibogluconate antimonials.

ELYP's surveillance, educational and management remote field campaigns are in need for vehicles and camping capabilities.

RLCC is in need of well-equipped clinics and lecture rooms at our branch units. It needs a sponsor to cover the basic operational costs, provide the laboratory with ELISA diagnostic kits, and provide patients with some protective means (bed nets, repellent creams, etc.).

Ultimately, public investment in our educational, treatment and control programs would decrease the leishmaniasis' local and global disease burden.

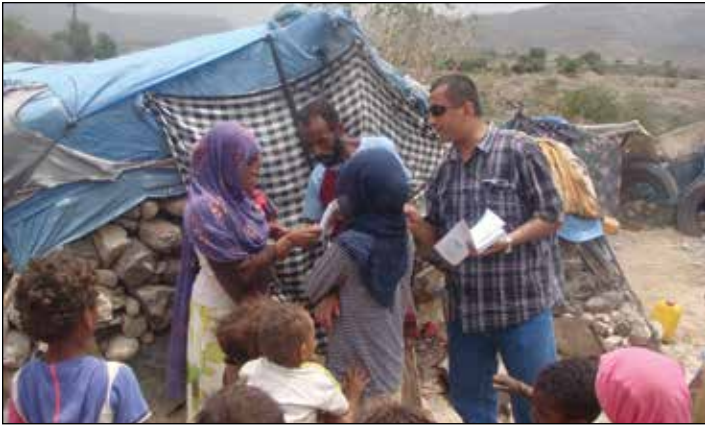

Dr. Al-Kamel (standing, wearing sunglasses) leading an ELYP awareness-raising and treatment campaign at a marginalized camp in Al Dhale', a governorate at Central Yemen.

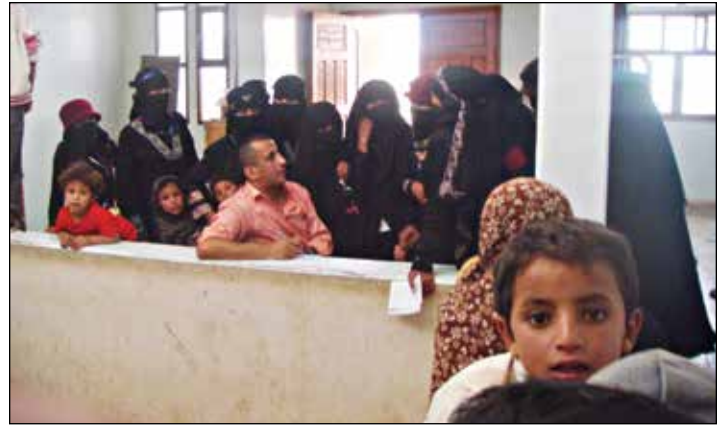

Dr. Al-Kamel seeing leishmaniasis patients in a primary health unit at a district where all inhabitants had leishmaniasis in Ibb governorate at central Yemen -- the most densely populated governorate in Yemen outside of Sana'a city.

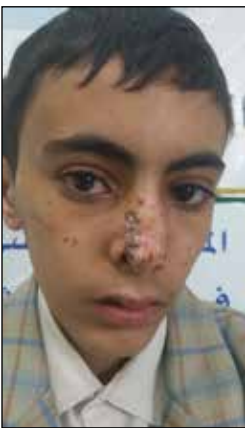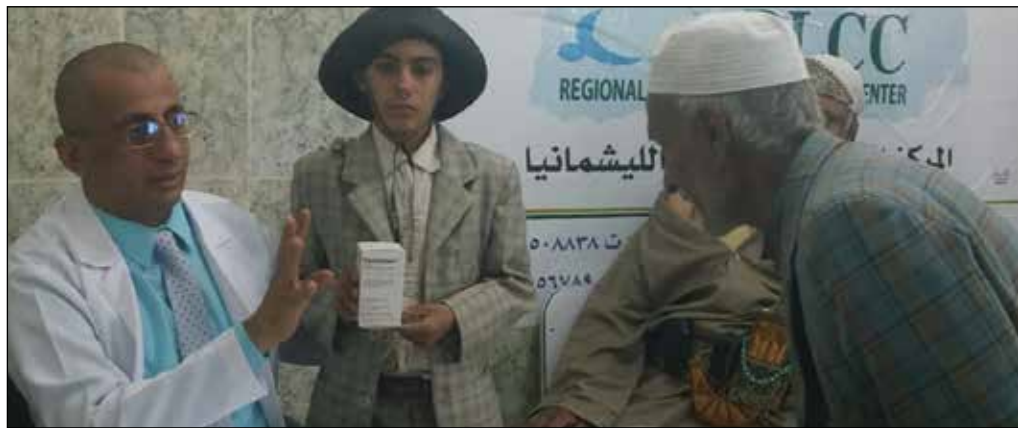

Leishmaniasis patients seen and given free medicine by ELYP volunteers at the RLCC's Al Baydaa Unit, Radaa district, Yemen.

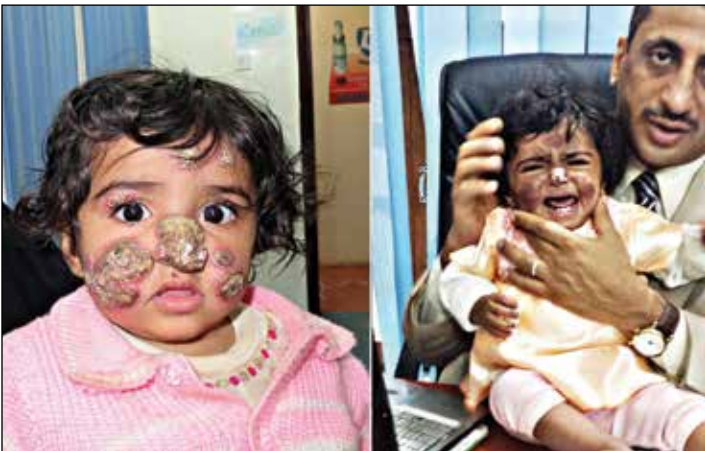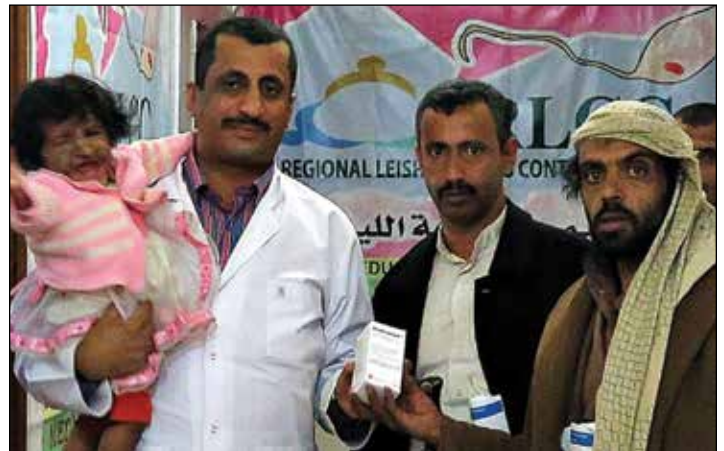

Before and after photos of disseminated cutaneous leishmaniasis (DCL) in a Yemeni female child (all of her family members had the same condition), managed and granted free medicine at the RLCC's clinic in Sana'a, the capital city.

**For more information, please visit:**

Website URL <http://www.RLCCye.org>  
 Facebook page <http://www.facebook.com/RLCCye>  
 Twitter account <https://twitter.com/RLCCyemen>

YouTube Videos <https://www.youtube.com/channel/UCT7D2GIub15FW8F6a8Ea8cw>  
 Blog <http://rlccye.blogspot.com/>

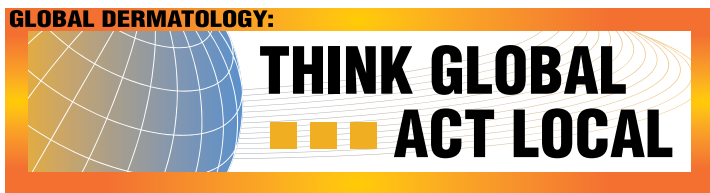

## ISD Member Supports Long-Standing Community Dermatology Program in Mexico

*An interview with ISD member Dr. Roberto Estrada (Mexico)*

### Describe the Mexico Community Dermatology program you are involved with.

This is a program of social assistance, focusing on the care of patients with skin disease in underserved communities and providing needed medications free of charge. Another main component is promoting the teaching of basic dermatology to health care professionals.

### How was the idea for this Community Dermatology project conceived?

The project began as a response to the growing needs in the communities to identify and appropriately treat patients with various dermatological diseases. We identified that specific diseases were prevalent, especially subcutaneous mycoses. Through the support of institutions such as the Ministry of Health and local government programs, the visits were extended. We have worked with the International Foundation for Dermatology (IFD), the International League of Dermatological Societies (ILDS) and the American Academy of Dermatology (AAD).

### Who is part of this program?

We are a private non-profit organization based in Mexico. In order to visit the various communities, we have the support of national and international dermatologists, dermatology residents, medical students and others who selflessly share our interest and appreciation for this social work -- promoting awareness and empathy for the needs of people in underserved communities.

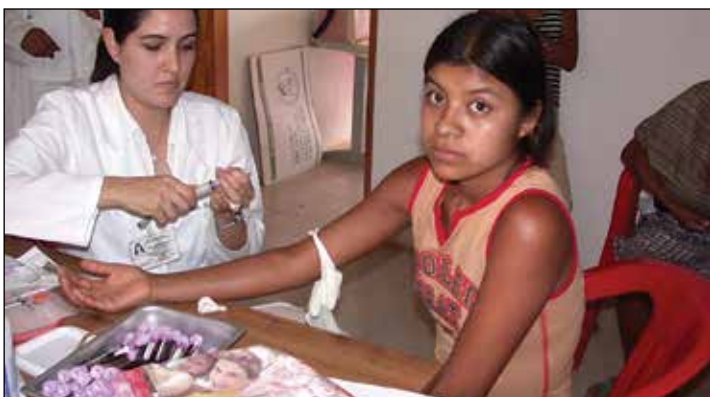

Sporotrichosis blood sampling

### Where do volunteers provide assistance?

Volunteers of the program have visited many times the seven regions of the State of Guerrero for over 23 years, providing more than 18,000 consultations in approximately 400 communities visited. Recently, the volunteer efforts have been extended to other regions of the Mexican Republic. We also have supported and encouraged that this program be replicated in other countries such as Argentina and Africa.

### What is the greatest impact of the program to these communities?

One of the main objectives is to provide specialized care to the community, improve the quality of life of patients with disabling diseases -- such as mycetoma, tuberculosis and sporotrichosis -- identify genetic diseases, and help with their treatment. In addition, the teaching given during the courses can train health care professionals, who in turn will be able to identify various skin diseases for reference and timely patient care.

### How often do volunteers visit these communities?

The visits average three to six per year, which will vary depending on the identified communities with the greatest needs.

### Who can participate and how can they contact this program?

We invite all health care professionals with an interest in dermatology or social assistance in health to participate in the conference on education in basic dermatology and dermatology community workshops. You can contact us through our website [www.dermatologiacomunitaria.org.mx](http://www.dermatologiacomunitaria.org.mx) or email us at [contacto@dermatologiacomunitaria.org.mx](mailto:contacto@dermatologiacomunitaria.org.mx).

### What satisfaction do you get personally from this program?

It is a way to give back in some way. The wonderful experience to be a doctor -- helping others in less favorable conditions -- knowing that diseases treated in time may be curable and thus prevent consequences that sometimes are irreversible. We give patients the treatment they need and we have the ability, through our specialty, to help. Dermatology is a branch of medicine in which many diseases are visible, tangible and treatable without sophisticated studies. Dermatologists must commit to improve the health and quality of life of our patients, so we invite you to join us and help make a difference.

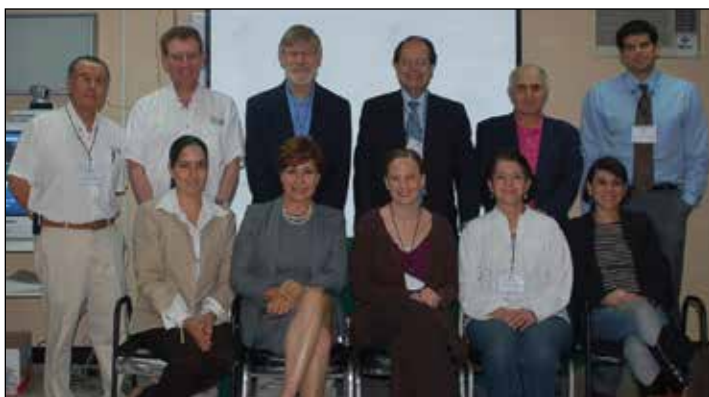

Professors, including Dr. Roberto Estrada (back row, third from right), at the International Teledermatology course

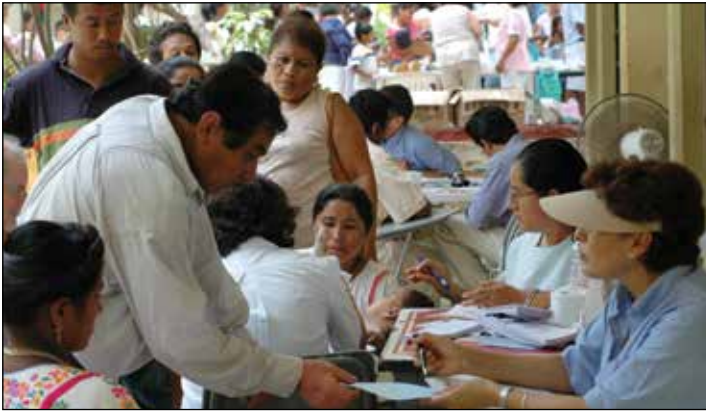

Dermatology consult in the community of Copala

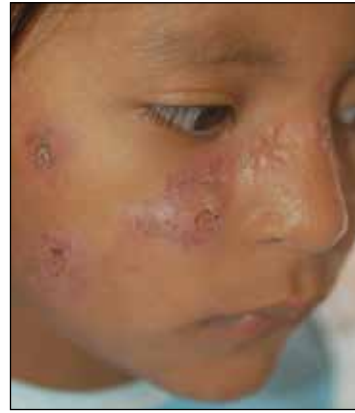

Patient with sporotrichosis

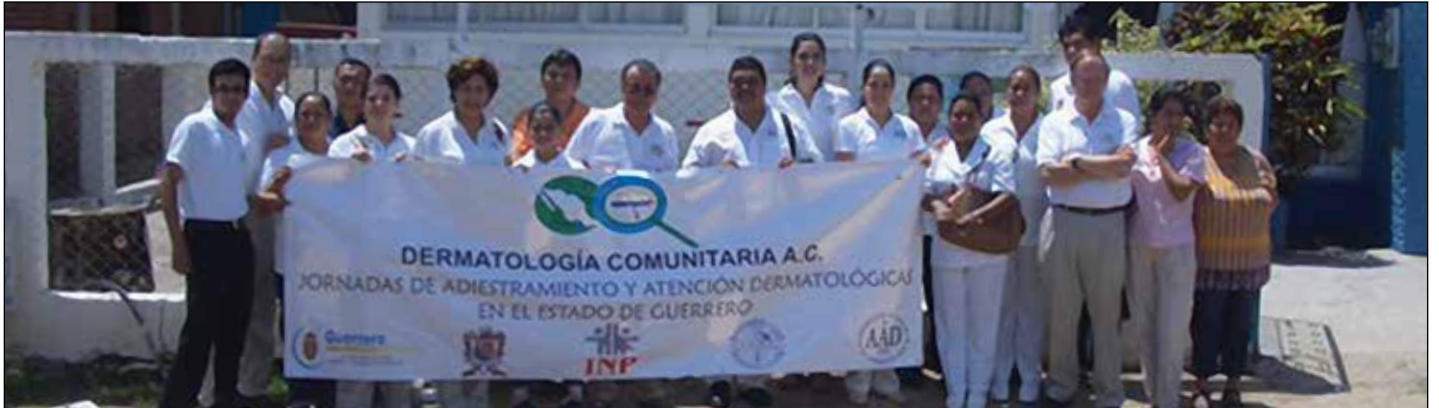

Work team in the community of Nuxco

# XII International Congress of Dermatology

April 18-22, 2017 - Buenos Aires, Argentina  
Sheraton Hotel & Convention Center

*Visit Argentina  
Las Glaceras National Park*

Magnificent natural beauty, it constitutes a wonder in the world, and was declared "World Heritage" by UNESCO in 1981.

## SCIENTIFIC PROGRAM COMMITTEE

**CHAIRMAN**  
Jorge Ocampo Candiani

**MEMBERS**

|                                                                                                                                                                                                                                                                                                                           |                                                                                                                                                                                                                                                                                                          |
|---------------------------------------------------------------------------------------------------------------------------------------------------------------------------------------------------------------------------------------------------------------------------------------------------------------------------|----------------------------------------------------------------------------------------------------------------------------------------------------------------------------------------------------------------------------------------------------------------------------------------------------------|
| <p>Luna Azulay Abulafia, <i>Brazil</i></p> <p>Maria Barona, <i>Colombia</i></p> <p>Jean Bologna, <i>USA</i></p> <p>Francisco Camacho, <i>Spain</i></p> <p>Ricardo Galimberti, <i>Argentina</i></p> <p>Gastón Galimberti, <i>Argentina</i></p> <p>Alberto Gianetti, <i>Italy</i></p> <p>Rod Hay, <i>United Kingdom</i></p> | <p>Steve Katz, <i>USA</i></p> <p>Francisco Kerdel, <i>USA</i></p> <p>Omar Lupi, <i>Brazil</i></p> <p>Dedee Murrell, <i>Australia</i></p> <p>Percy Naidu, <i>South Africa</i></p> <p>Ricardo Perez Alfonzo, <i>Venezuela</i></p> <p>Thomas Ruzicka, <i>Germany</i></p> <p>Rajeev Sharma, <i>India</i></p> |
|---------------------------------------------------------------------------------------------------------------------------------------------------------------------------------------------------------------------------------------------------------------------------------------------------------------------------|----------------------------------------------------------------------------------------------------------------------------------------------------------------------------------------------------------------------------------------------------------------------------------------------------------|

Supported by  
International Society of Dermatology

[icd2017.com.ar](http://icd2017.com.ar)

## The Big Challenge: Precision Medicine

## Behind the Scenes: Getting to Know your ISD Board Members

Despite busy professional and personal lives, members of the ISD Board of Directors spend a significant amount of time working to improve the quality of all the benefits the Society offers its members. Whether overseeing the editorial content of the ISD newsletter or helping plan one of the ISD's many educational programs, ISD Board Members play a vital role in nearly all aspects of ISD.

*Here, meet two ISD Board Members who have been heavily involved in ISD -- Dr. Dedee Murrell (Australia/UK), Chair, Communications Committee; and Dr. Lawrence Gibson (US), Chair, Education Committee.*

**Dr. Murrell, you are an internationally recognized expert in blistering disorders, especially epidermolysis bullosa. What sparked your interest in this area of dermatology?**

A series of coincidences was how I became passionate about blistering diseases. When I was a medical student at Oxford, I married an Australian Rhodes scholar, George Murrell, who was then offered orthopaedic training at Duke University in North Carolina, USA. I entered Duke as a pre-dermatology fellow and was matched in dermatology at the University of North Carolina at Chapel Hill, which is a center for expertise in autoimmune blistering diseases (AIBD). Having gained valuable experience in clinical trials, this led me to research fellowships at NYU and Rockefeller University in New York City, where I managed the EB patients for the Northeastern USA. With my particular interest in translational research and therapeutics, I established the first clinical trials center in dermatology in Australia, focusing on biologics for psoriasis, eczema, medical therapies for skin cancer and investigator initiated studies, such as our RCT of cell therapy for EB.

**You have a busy dermatological career in Australia, yet you have devoted much of your time to organizations such as the ISD. What makes ISD close to your heart? In what way do you foresee ISD's role in the international dermatological community?**

I joined ISD 20 years ago when I moved to Sydney as a means of feeling connected with the international dermatology community. I love the way ISD has meetings moving from continent to continent, including countries not often on the international agenda for dermatology. I loved being part of the ISD's Maria Duran Committee in 2005, and subsequently, its Chair, as well as being on the scientific committees for the past congresses. I am looking forward to chairing ICD 2021 in Melbourne, Australia, with my colleague, Rod Sinclair. I am passionate about mentorship, particularly enhancing people's opportunities via networking, chairing the Communications Committee and executive activities of the ISD.

I often visit hospital departments overseas and see bullous disease patients, and we learn from each other that way. I see the ISD leading the way in giving more platforms for regional dermatology practices to be seen. ISD could be a stakeholder in the development of traditional medicines into extracts with scientifically sound and safe indications in dermatology, and we could set up a committee to work on this area.

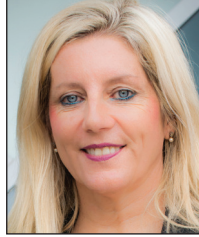

Dr. Dedee Murrell

**How do you balance your personal life with your professional life?**

I have always had a lot of energy, and my mother, aunt and grandmother were good role models for balancing careers, volunteering and raising children. Our two sons, now 21 and 19 and away at college, and our 17-year-old daughter, come on holidays with us and have the wanderlust genes as well. We all focus on work during the week and have family time for watching their sports, seeing friends and family on weekends.

**Besides dermatology, what else are you passionate about?**

I enjoy historical places and reading historical fiction. I love exploring new places and meeting people from different races, religions and backgrounds. I run regularly and love dancing. And I'm especially fond of foreign films.

**Dr. Gibson, you served for 13 years as editor of the *International Journal of Dermatology (IJD)* before retiring from this post in December 2013. What has been keeping you busy since then?**

I am very happy to see the *Journal* flourishing under its new leadership and remain very proud of the work we did as an editorial team during those years.

I still play a role with the *Journal*, acting as an editor for the Correspondence section and helping oversee the Review articles. I remain much occupied with my work as a clinician and a dermatopathologist. I serve as a course director for a dermatopathology review course for the American Society of Dermatopathology and now also serve as the President-elect for that society. I still enjoy working with colleagues in the International Society of Dermatology and serve as chair of the Education Committee.

**What is your fondest memory of serving as the *IJD* editor?**

When we were at one of our earlier Editorial Board meetings in 2003 and it was clear we were making definite headway with the *Journal*, and to receive positive feedback from the Executive Committee of the ISD and from so many members of the Society... I remember that as a huge relief and an uplifting experience! I have had many, many fond memories related to the *Journal* and feel very blessed to have had the opportunity to serve in that role.

**What three words best describe you?**

Kind, thoughtful and disciplined would be three that I aspire to, but hopefully others would agree to describe me with those words as well.

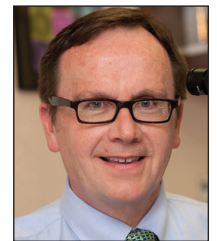

Dr. Lawrence Gibson



Continued from page 8

## When you're not practicing dermatology, what do you like to do in your off time?

Travel. The *Journal* and the ISD have opened many avenues for meeting others and for travel, which I enjoy. I'm fond of most water-related sports including swimming, snorkeling, sailing and scuba when I have time. We took surfing lessons a couple of years ago, and I wish I could have learned that sport, too, as a younger person!

## MEMBERS IN THE NEWS

The ISD proudly recognizes members who are accomplishing great things and fulfilling the mission of the ISD.

Past president of the XI ICD  
**Prof. Vinod K. Sharma** (India) is the incoming International Board Observer to the American Academy of Dermatology (AAD)'s Board of Directors. This prestigious appointment makes him a non-voting board member of the AAD. He will serve for two years in this role.

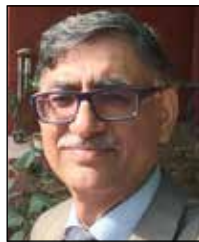

Prof. Vinod K. Sharma

## ISD Announces Call for Nominations

Ever thought about serving in a leadership role with the ISD? If you think you have what it takes to be the ISD's next president or a vice president, consider applying for one of the many open leadership positions that will be available starting in 2017.

The Nominating Committee of the ISD is now inviting applications from the membership for open leadership positions. The membership will vote on the slate of nominees chosen by the Nominating Committee during the General Membership Committee at the XII International Congress of Dermatology in Buenos Aires, Argentina. Applications will be accepted online at [www.intsocderm.org](http://www.intsocderm.org) from April 1 - June 30, 2016.

### Open Leadership Positions include:

#### Officers

President (1 term)  
Executive Vice President (1 term)  
Secretary-General (2 terms)  
Associate Secretary-General (1 term)  
Treasurer-General (2 terms)

#### Other Non-Officer Appointments

Archivist-Historian (2 terms)  
Vice Presidents (10 total for 1 term)  
Directors (25 total, eligible for re-election)

A term is considered from the start of one ICD to the next ICD (generally four years). The next ICD will take place in April 2017.

Only Regular and Individual Sponsoring Members in good standing for at least three years may be nominated for the Board of Directors (including Officers). Nominees will be selected from the applications based on leadership skills, ethical conduct, commitment to the specialty of dermatology and level of activity within the Society.

## 2016 Meetings Calendar

### March 2016

March 7, 2016

ISD Member Reception at the AAD  
Marriott Marquis  
Capitol/Congress Room  
5:30 p.m. - 7:30 p.m.  
Washington, DC USA  
RSVP at [www.intsocderm.org](http://www.intsocderm.org)

### April 2016

April 12-14, 2016

5th Continental Congress  
of Dermatology & Dubai Derma 2016  
Dubai, United Arab Emirates  
Contact: [mark.anthony@index.ae](mailto:mark.anthony@index.ae)  
Web Site: [www.dubaiderma.com](http://www.dubaiderma.com)

April 15-17, 2016

International Congress  
of Dermatology, Cosmetic & Laser  
Tehran, Iran  
Contact: [dowlati@yahoo.com](mailto:dowlati@yahoo.com)  
Web Site: <http://crtSDL.tums.ac.ir>

### May 2016

May 27, 2016

ISD Regional Meeting at the  
National Congress of Dermatology  
(Chinese Society of Dermatology)  
Xiamen, China  
Contact: Ning Zhong at [cmazhongning@163.com](mailto:cmazhongning@163.com)

### July 2016

July 12-16, 2016

1st African Society of Dermatology  
& Venereology Conference  
Abuja, Nigeria  
Contact: Ayesha Akinkugbe  
at <http://www.asdvafrika.org>

July 28, 2016

Ethiopian Dermatology  
and Venereology Society\*  
4th Annual Scientific Conference  
Addis Ababa, Ethiopia  
Contact: [edvsociety@gmail.com](mailto:edvsociety@gmail.com)

### August 2016

August 11-14, 2016

International Congress  
of Tropical Dermatology\*  
Colombo, Sri Lanka  
Web Site: [www.ictd2016.org](http://www.ictd2016.org)

### September 2016

September 1-3, 2016

10th ISD Update Course in Dermatology:  
Maria Duran Regional Meeting  
Cali, Colombia  
Contact: Rafael Falabella  
at [falabellarafael@gmail.com](mailto:falabellarafael@gmail.com)

\* ISD Regional Meeting

## SAVE THE DATE!

April 18-22, 2017

XII International Congress of Dermatology  
Sheraton Hotel & Convention Center

Buenos Aires, Argentina

Contact: [icdbue2017@anajuan.com](mailto:icdbue2017@anajuan.com)

For more information: <http://icdbue2017.com.ar/>

## Young Dermatologists from the Philippines Gain Knowledge and Skills, thanks to ISD Mentorship Program

### ISD Mentorship in Munich Leaves Lasting Impression

During her training at the Ludwig-Maximillan University in Munich, Germany, in August 2015, ISD mentorship awardee Dr. Abelaine Venida-Tablizo (Philippines) considered herself lucky to experience high-end facilities and quality care in the management of dermatology cases there.

By doing daily morning rounds with her mentor, Prof. Thomas Ruzicka (Germany), Dr. Venida-Tablizo experienced the patient/doctor relationship in the hospital and proper training of residents during the rounds. She was impressed that all the departments offer advanced procedures and methods of care, as most of these top-of-the-line technologies are not available in her country and a lot of the therapeutics used are meagerly available and at significantly high prices -- making them unattainable by the majority of Filipinos.

Dr. Venida-Tablizo's rotations were focused on infectious dermatology, as leprosy is her advocacy. She also had the chance to rotate in the departments of bacteriology, microbiology, allergology and trichology where she was exposed to many standard procedures that are not routinely done in her hospital in the Philippines due to the high costs. The daily conferences she participated in were invaluable, as she realized the importance of reviewing actual cases seen during the day.

As a consultant of the Jose R. Reyes Memorial Medical Center's Dermatology Department, an accredited institution training future dermatologists, Dr. Venida-Tablizo realized countless possibilities that will aid in the advancement of her institution's training program. She expressed how hopeful and excited she is for the future in managing dermatology cases in the Philippines based on the innovations in techniques, services and procedures she experienced firsthand in Munich.

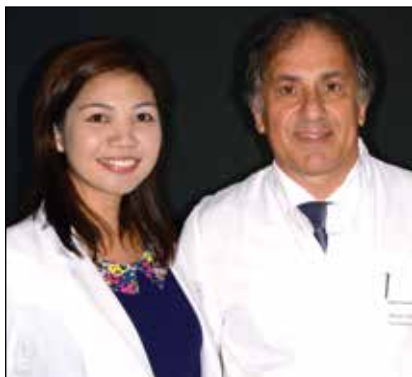

Dr. Abelaine Venida-Tablizo (left) with mentor Prof. Thomas Ruzicka

*"This training not only changed my point of view for the future of dermatology in the Philippines, it enlightened me about the quality of management of patients and inspired me to be a better dermatologist serving our patients."*

– Dr. Abelaine Venida-Tablizo

### ISD Mentorship in Bangkok Focuses on Phototherapy and Photodermatology

ISD mentorship awardee Dr. Pearl Weena Marie Sabido applied to the ISD mentorship program for two main reasons -- one, to train in phototherapy and photodermatology; and two, to train under Dr. Pravit Asawanonda (Thailand).

Dr. Sabido had a strong background in photodermatology while undergoing dermatology residency training at St. Luke's Medical Center in the Philippines. She saw how much phototherapy could be of great benefit in many dermatologic conditions, inspiring her to further her knowledge in this subspecialty. And because there are no formal fellowship programs in photodermatology in the Philippines, she then looked to training under Dr. Pravit in Bangkok so she could specialize in this field. Incidentally, Dr. Sabido has looked up to Dr. Pravit ever since she heard him give talks in their locally held national conventions.

Dr. Sabido spent three months, from August to October 2015, in the Division of Dermatology of the King Chulalongkorn Memorial Hospital in Bangkok, Thailand, where she was further exposed to psoriasis cases, followed by eczemas, vitiligo, mycosis fungoides, and pruritus. Ascertaining various management techniques of these dermatoses using photodermatology definitely enhanced her knowledge and skill. She described her learning experience there as some of the most fulfilling and academically enriching months of her medical career.

According to Dr. Pravit, "I don't think that you should just treat patients; I think you should create an experience [for them]. They should go out of your clinic happy." These words left a lasting impression on her. Dr. Sabido believes that he applies this "creating an experience" not just on how he treats his patients, but also on how he teaches his students and inspires other people to learn from him.

At the end of her fellowship, Dr. Sabido was tasked to give a talk on phototherapy, which led her to a better understanding and appreciation of this field. She also took Dr. Pravit's advice to heart, inspiring her to be a more compassionate dermatologist and in doing so "creating an experience" for her patients.

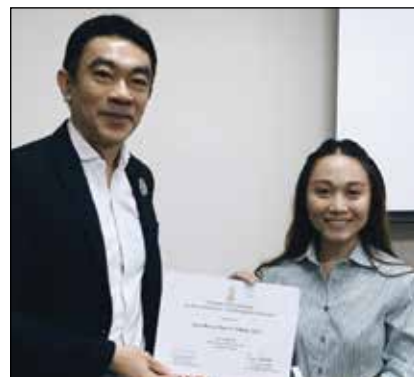

Dr. Pearl Weena Marie Sabido (right) with mentor Dr. Pravit Asawanonda

*"The rich learning environment during this fellowship, coupled with the incomparable warmth and hospitality I felt from the Thai people, has definitely been a wonderful experience. I know that this will help me be of better service to my patients in the Philippines."*

– Dr. Pearl Weena Marie Sabido

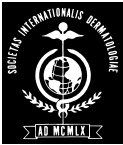

# International Society of Dermatology

## APPLICATION FOR MEMBERSHIP

Join online at [www.intsocderm.org](http://www.intsocderm.org)

(Please print or type clearly)

Name \_\_\_\_\_  
(Last/Family) (First/Given) (Middle)

Institution \_\_\_\_\_

Address \_\_\_\_\_  
(Street) (Apt. or Suite No.)

(City) (State/Region) (Postal Code) (Country)

Telephone \_\_\_\_\_ Fax \_\_\_\_\_  
(Country/City Code) (Area Code) (Number) (Country/City Code) (Area Code) (Number)

E-mail \_\_\_\_\_ Birthdate \_\_\_\_\_  
(Month/Day/Year)

Scientific Degree (e.g., M.D., M.B.B.S., Ph.D., M.S., B.S., etc.) \_\_\_\_\_ Gender:  Male  Female

1. I wish to join the ISD membership in the following category (please check only one):

### INDIVIDUAL MEMBERSHIPS:

       **Regular Member** ..... US \$125.00  
This is the regular and usual membership of the Society. Annual dues of US \$125.00 include a subscription to the *International Journal of Dermatology*. May hold elective office and vote.

       **E-Member** ..... US \$45.00  
This is a new category of membership, which is available to members living and practicing in a Group A or Group B country as defined by WHO and the World Bank.\* Available to those who are eligible, e-members will receive only electronic access to the *International Journal of Dermatology* and all correspondence will be electronic. (If you are a current member wishing to switch to this level, you need to contact the ISD office in order to change your membership status)  
\*A complete list of those countries can be found at <http://www.who.int/hinari/eligibility/en/>.

       **Associate Member** ..... US \$75.00  
This category is suggested for residents/medical students of any country, or dermatologists currently staying in developing countries (designated by OECD). Annual dues of US \$75.00 include a subscription to the *International Journal of Dermatology*. Associates cannot hold elected office or vote on Society matters.

       **Individual Sponsoring Member** ..... US \$250.00  
This category is for individuals who want to sponsor members from developing countries or trainees (residents) from any country. In addition to the privileges and benefit of the Regular Membership, the sponsor will receive an Individual Sponsoring Member certificate. The annual dues of US \$250.00 sponsor up to 2 Associate Members in addition to the sponsor's membership.

Sponsoring Members may select 1 or 2 eligible members to support or allow ISD to select from a list of eligible candidates.

       Let ISD select the sponsored members

       I would like to sponsor the following dermatologists and/or dermatologists in training. The names are listed below.

Sponsored Member Name: \_\_\_\_\_

Email: \_\_\_\_\_

Sponsored Member Name: \_\_\_\_\_

Email: \_\_\_\_\_

2. Payment is to be made in U.S. Dollars.

Indicate method of payment:

       **Check** payable in US \$ to: International Society of Dermatology

       **Credit Card** (preferable for applications made outside the U.S.; please complete the adjacent box)

3. Send completed application with payment by fax or mail to:

INTERNATIONAL SOCIETY OF DERMATOLOGY  
8074 EAGLE WAY • CHICAGO, IL 60678-1080 USA

**Phone:** +1 386-437-4405      **Fax:** +1 386-437-4427

**E-mail:** [info@intsocderm.org](mailto:info@intsocderm.org)

**Web site:** [www.intsocderm.org](http://www.intsocderm.org)

**Print clearly. Please check card type:**

MasterCard     Visa     American Express

\_\_\_\_\_ **Card Number**

\_\_\_\_\_ **Expiration Date**

\_\_\_\_\_ **Cardholder's Name**

\_\_\_\_\_ **Signature**

# INTERNATIONAL SOCIETY OF DERMATOLOGY

## EXECUTIVE COMMITTEE

### President

Evangeline Handog, MD (Philippines)

### Executive Vice President

Jean Bolognia, MD (USA)

### Secretary-General

Nellie Konnikov, MD (USA/Russia)

### Assistant Secretary-General

Marcia Ramos-e-Silva, MD, PhD (Brazil)

### Treasurer

George Reizner, MD (USA)

### Chair, Communications Committee

Dedee Murrell, BMBCh, MD, FACD  
(Australia/UK)

### Chair, Membership Committee

Thomas Ruzicka, MD (Germany)

### Immediate Past President

Francisco Kerdel, MD (USA)

## VICE PRESIDENTS

Luca Borradori, MD (Switzerland)

Paulo Rowilson Cunha, MD, PhD (Brazil)

Lawrence Gibson, MD (USA)

Abdul-Ghani Kibbi, MD (Lebanon)

Aldo Morrone, MD (Italy)

Keyvan Nouri, MD (USA)

Vinod K. Sharma, MD (India)

Gail Todd, MD, PhD (South Africa)

Shyam Verma, MD (India)

Oliverio Welsh, MD (Mexico)

## DIRECTORS

Kassahun Bilcha, MD (Ethiopia)

Luiz G M Castro, MD, PhD (Brazil)

Hong-Duo Chen, MD (China)

Pavel Chernyshov, MD, PhD (Ukraine)

Nejib Doss, MD (Tunisia)

Yahya Dowlati, MD, PhD (Iran)

Mercedes Florez-White, MD (USA)

Xinghua Gao, MD, PhD (China)

Sima Halevy, MD (Israel)

Martin Kassir, MD (USA)

Louise Kronborg Andersen, MD (Denmark)

Sujith Prasad Kumarasinghe, MD (Australia)

Koushik Lahiri, MD (India)

Margarita Larralde, MD, PhD (Argentina)

Mojakgomo Hendrick Motswaledi, MD (South Africa)

Jorge Ocampo-Candiani, MD (Mexico)

Adebola Ogunbiyi, MD (Nigeria)

Azer Rashid, MD, PhD (Pakistan)

Rashmi Sarkar, MD (India)

Robert Schwartz, MD (USA)

Rekha Sheth, MD (India)

Jacek Szepletowski, MD, PhD (Poland)

Alin Laurentiu Tatu, MD, PhD (Romania)

Kenneth Tomecki, MD (USA)

Antonella Tosti, MD (USA/Italy)

## ARCHIVIST HISTORIAN

Anthony Benedetto, DO (USA)

International Society of Dermatology  
2323 North State Street #30  
Bunnell, FL 32110 USA  
Phone: (386) 437-4405  
Fax: (386) 437-4427  
E-mail: [info@intsocderm.org](mailto:info@intsocderm.org)  
Web site: [www.intsocderm.org](http://www.intsocderm.org)

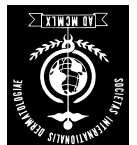

Supplement: mmc4.pdf [file mmc4.pdf]
