# Supplementary material for: Impact of leishmaniasis in women: a practical review with an update on my ISD-supported initiative to combat leishmaniasis in Yemen (ELYP)
Source: PubMed Central journal article supplement — Int J Womens Dermatol. 2016 Jun 16;2(3):93–101. doi: 10.1016/j.ijwd.2016.04.003 (PMC5418880; doi:10.1016/j.ijwd.2016.04.003), 2016-06-16
Supplement: mmc3.pdf [file mmc3.pdf]

12/31/2014

## Eradication of Leishmaniasis from Yemen Project (ELYP)

### Regional Leishmaniasis Control Center (RLCC), Yemen

Annual Report – 2015

Leishmaniasis patients benefited from Stiefel/GSK

Pentostam Donation for the 1st Year

(Oct. 2014-Dec. 2015)

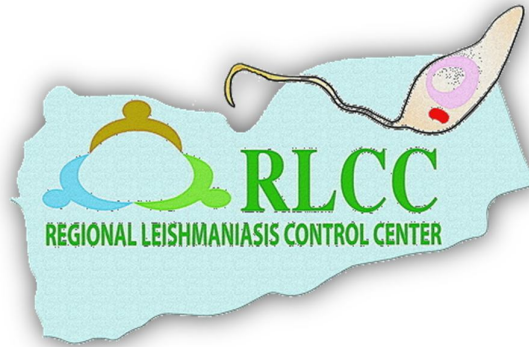

## المركز الإقليمي لمكافحة الليشمانيا - اليمن

التقرير السنوي 2015

المرضى المستفيدون من منحة الدواء المقدمة من شركة  
جلاكسو/ستيفل للسنة الأولى (أكتوبر 2014-ديسمبر 2015)

RLCC - Yemen  
DR. MOHAMED A. AL-KAMEL

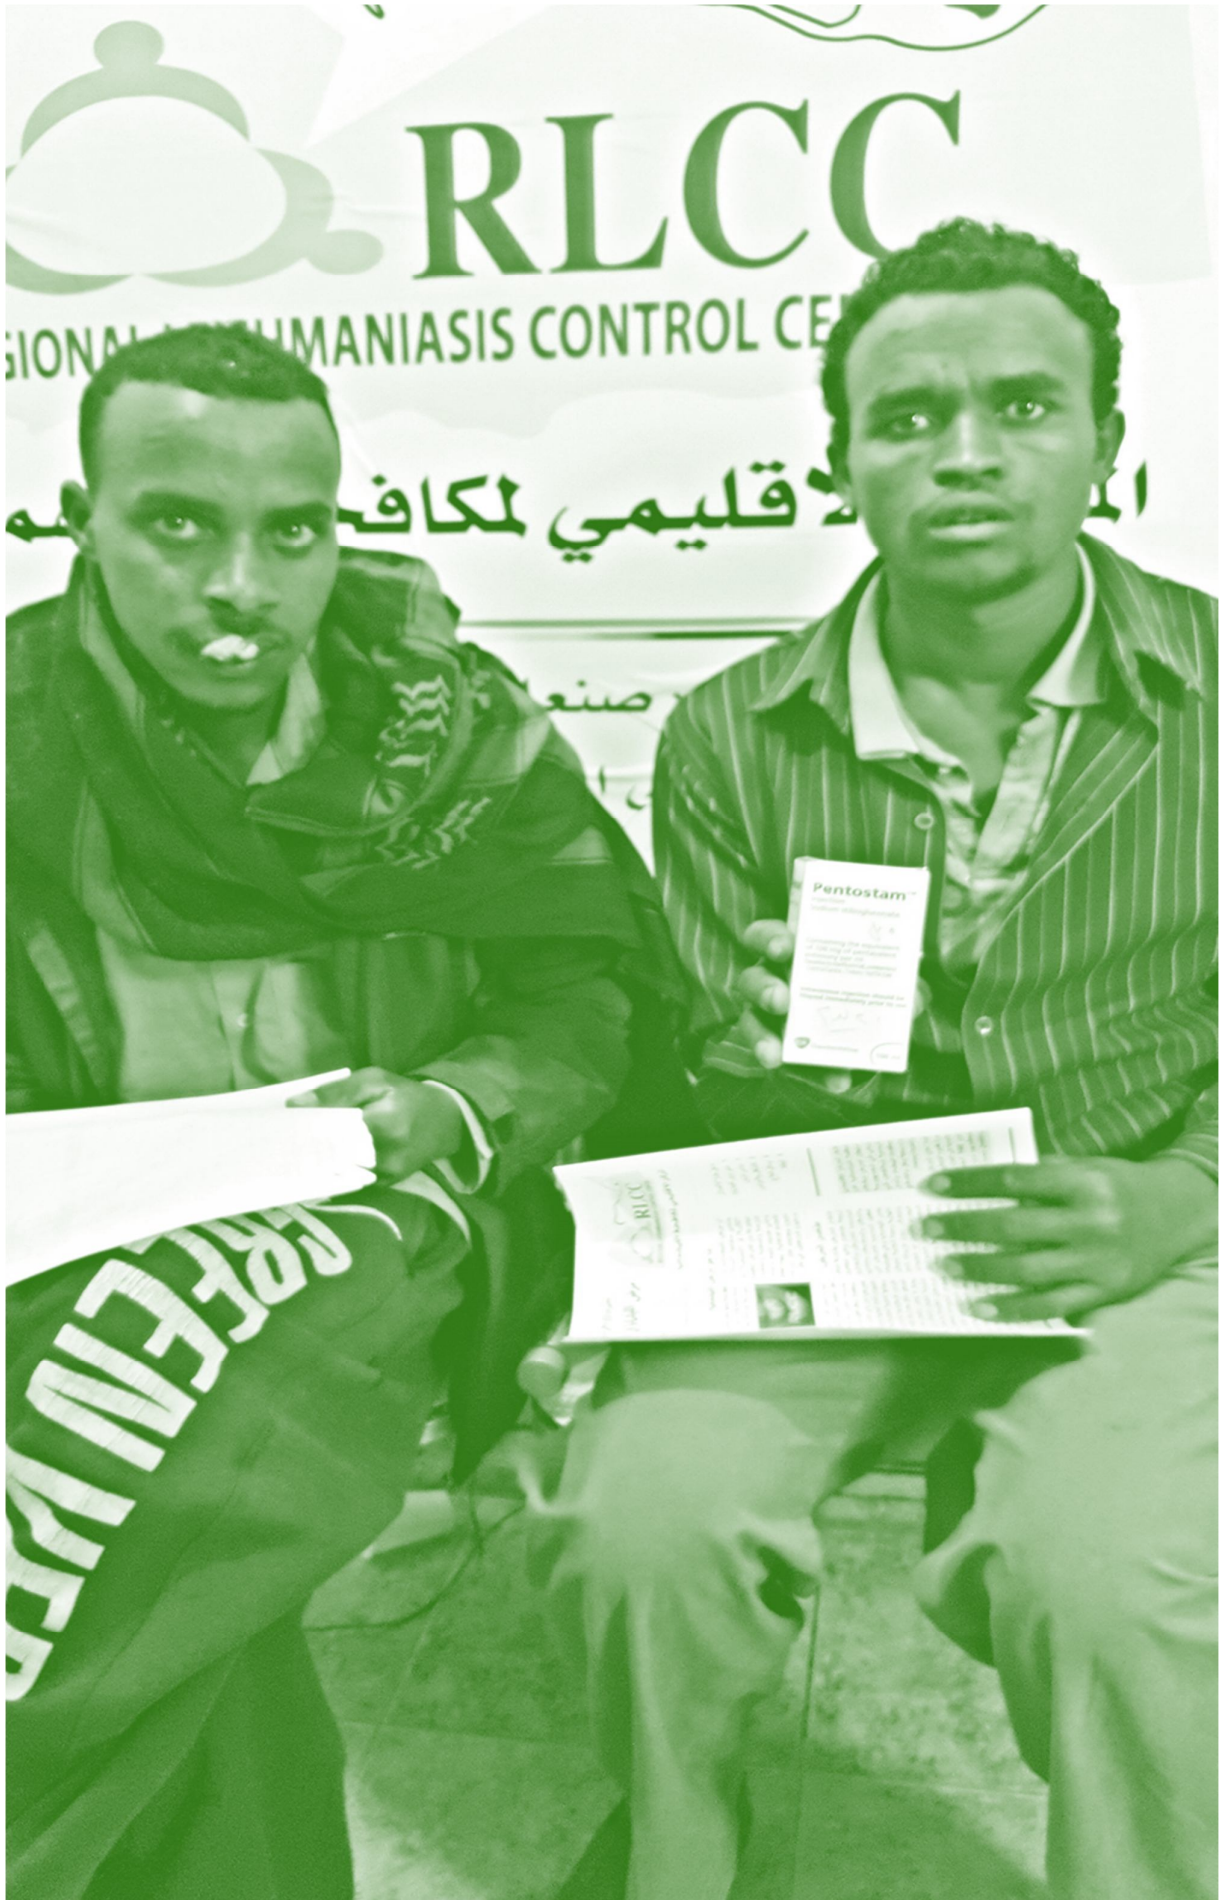

**SUMMARY – TOOTAL PATIENTS BY SEX AND  
DIAGNOSIS ملخص عدد الحالات المستفيدة من حيث الجنس والتشخيص**

| <b>Diagnosis التشخيص</b>                                         | <b>Females<br/>اناث</b> | <b>Males<br/>ذكور</b> | <b>Total<br/>مجموع</b> | <b>%</b>            |
|------------------------------------------------------------------|-------------------------|-----------------------|------------------------|---------------------|
| <b>Cutaneous<br/>leishmaniasis (CL)<br/>ليشمانيا جلدية</b>       | 96                      | 95                    | 191                    | <b>54.89<br/>%</b>  |
| <b>Mucocutaneous<br/>leishmaniasis (MCL)<br/>ليشمانيا مخاطية</b> | 68                      | 71                    | 139                    | <b>39.94<br/>%</b>  |
| <b>Visceral leishmaniasis<br/>(VL) ليشمانيا حشوية</b>            | 6                       | 12                    | 18                     | <b>5.17<br/>%</b>   |
| <b>Grand Total المجموع</b>                                       | <b>170</b>              | <b>178</b>            | <b>348</b>             | <b>100.00<br/>%</b> |

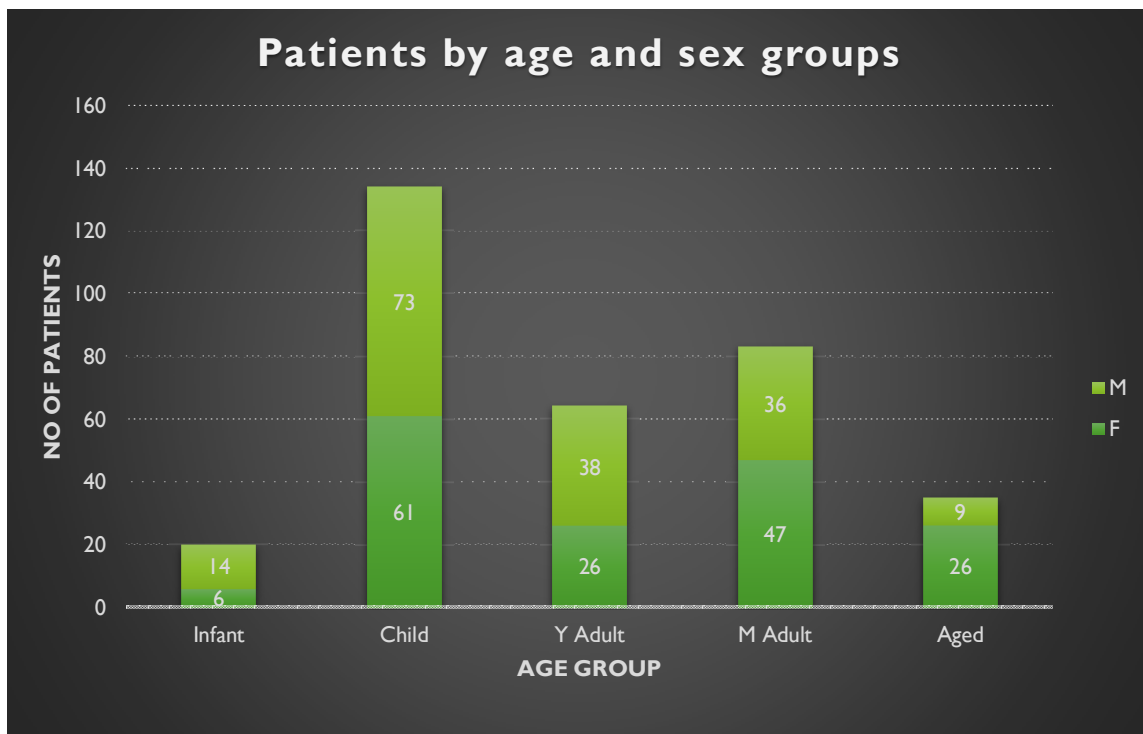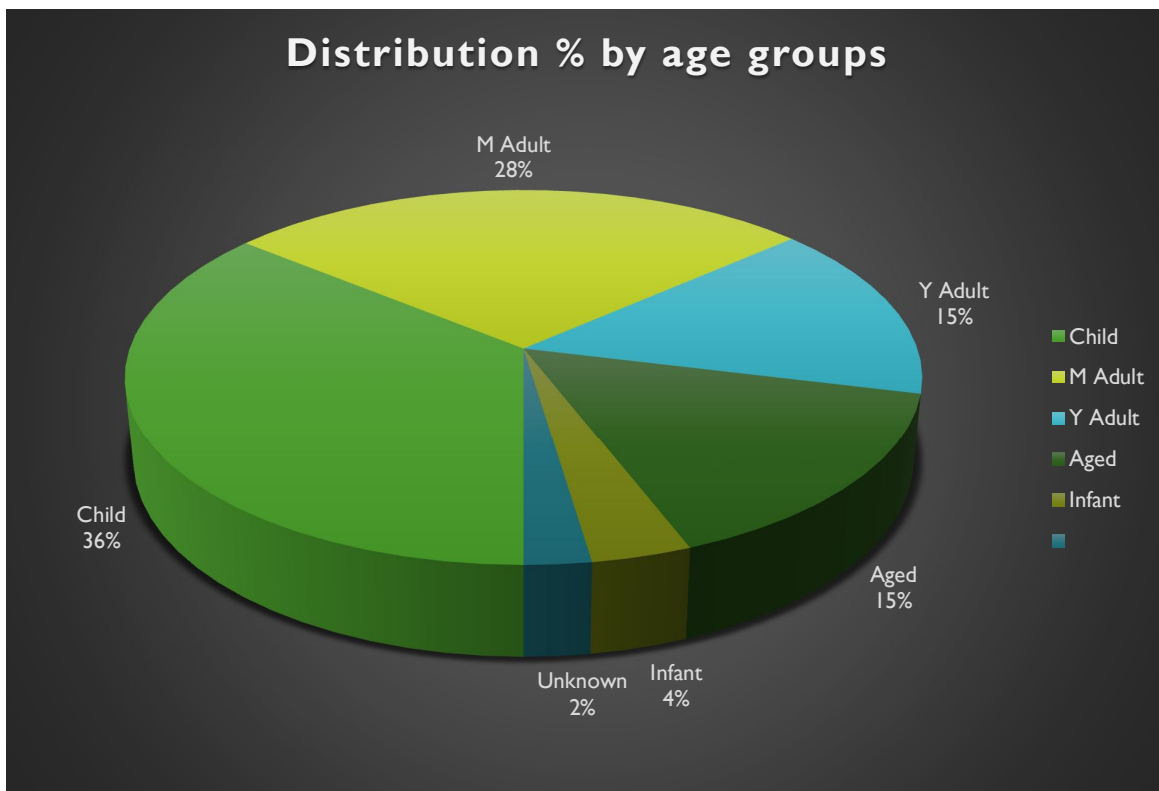

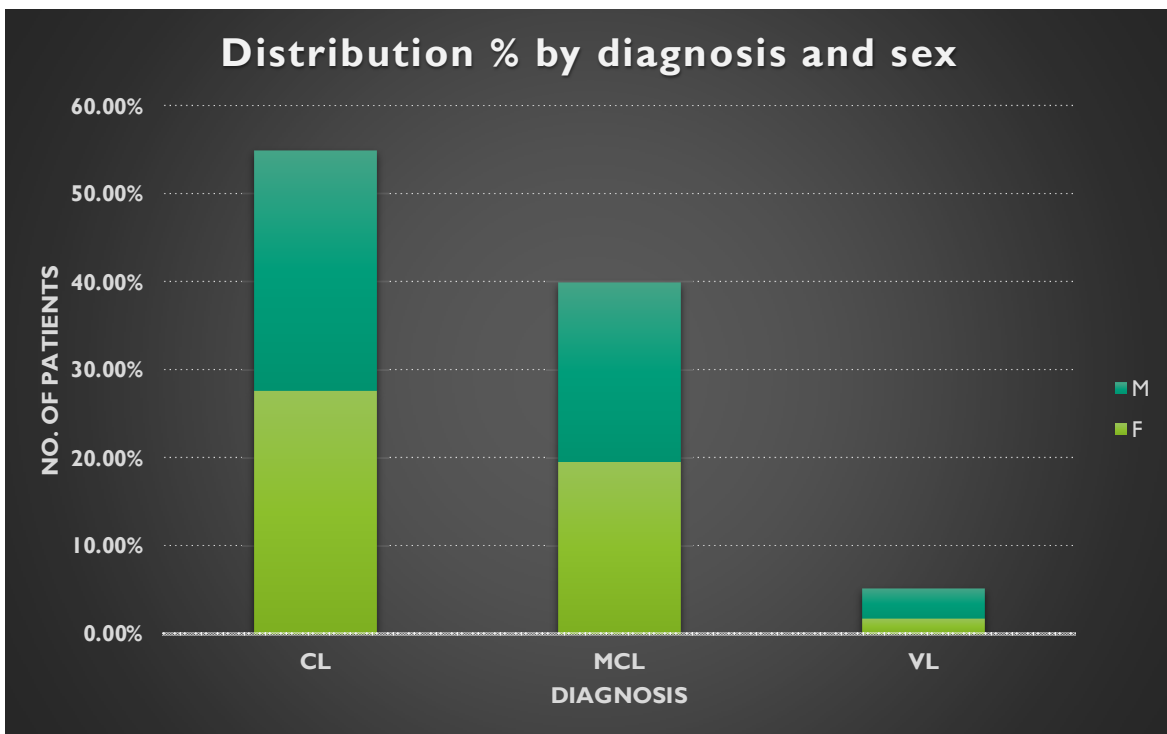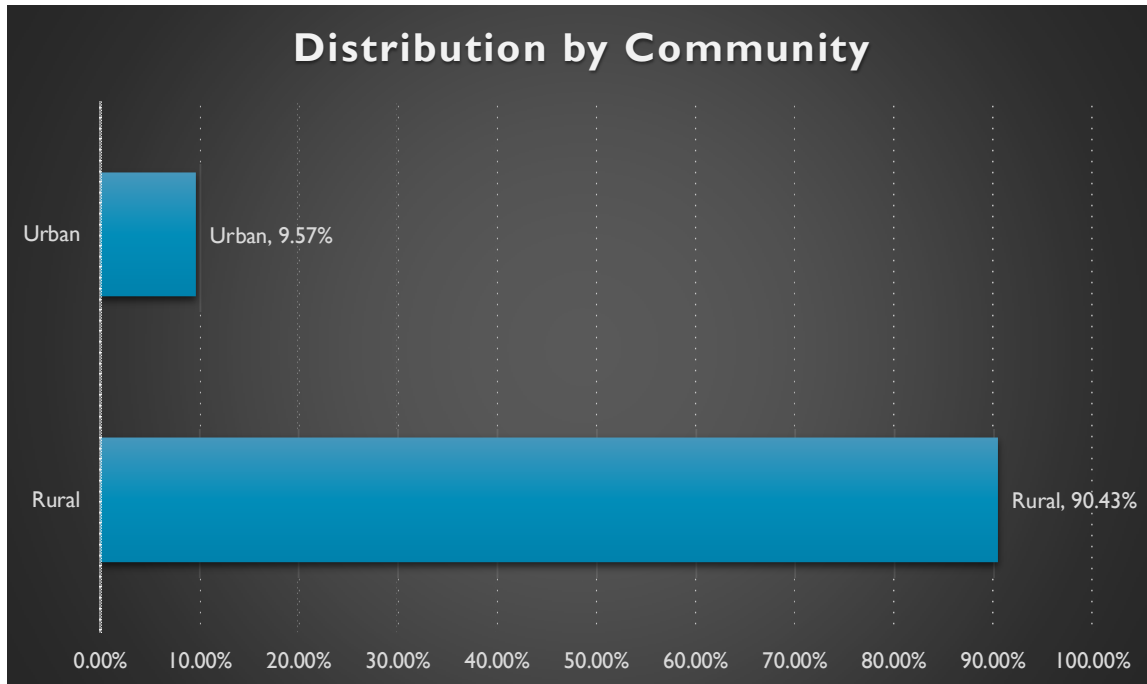

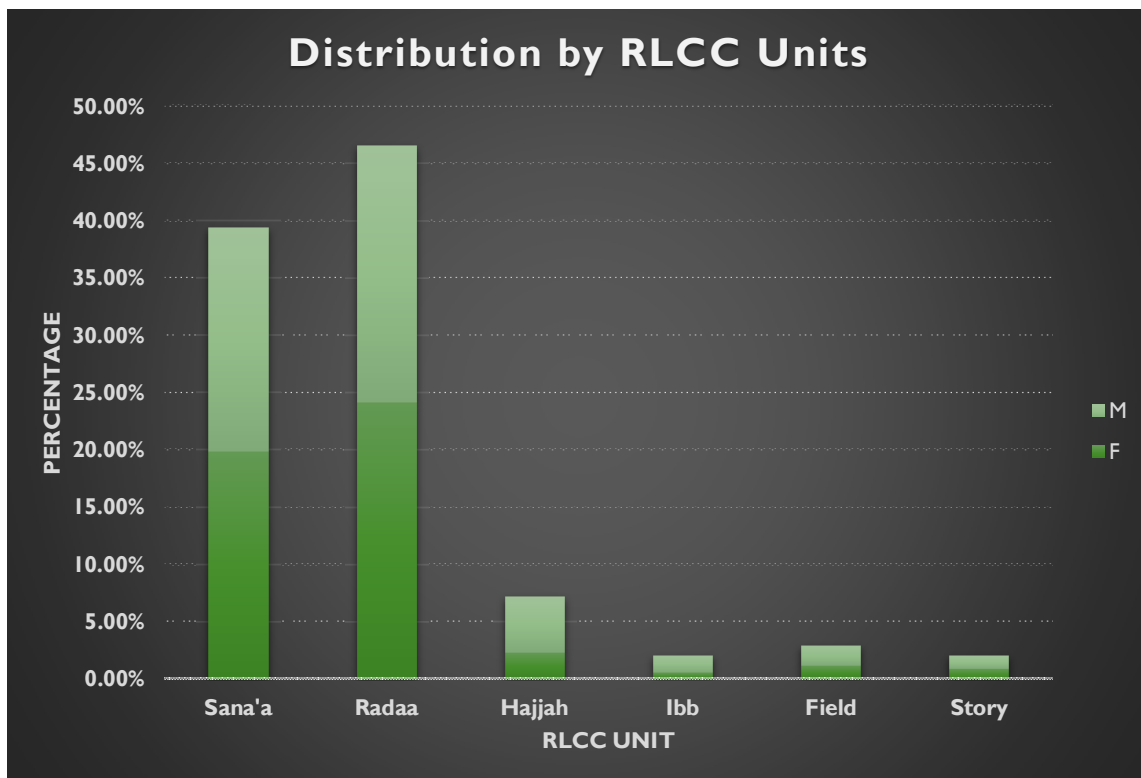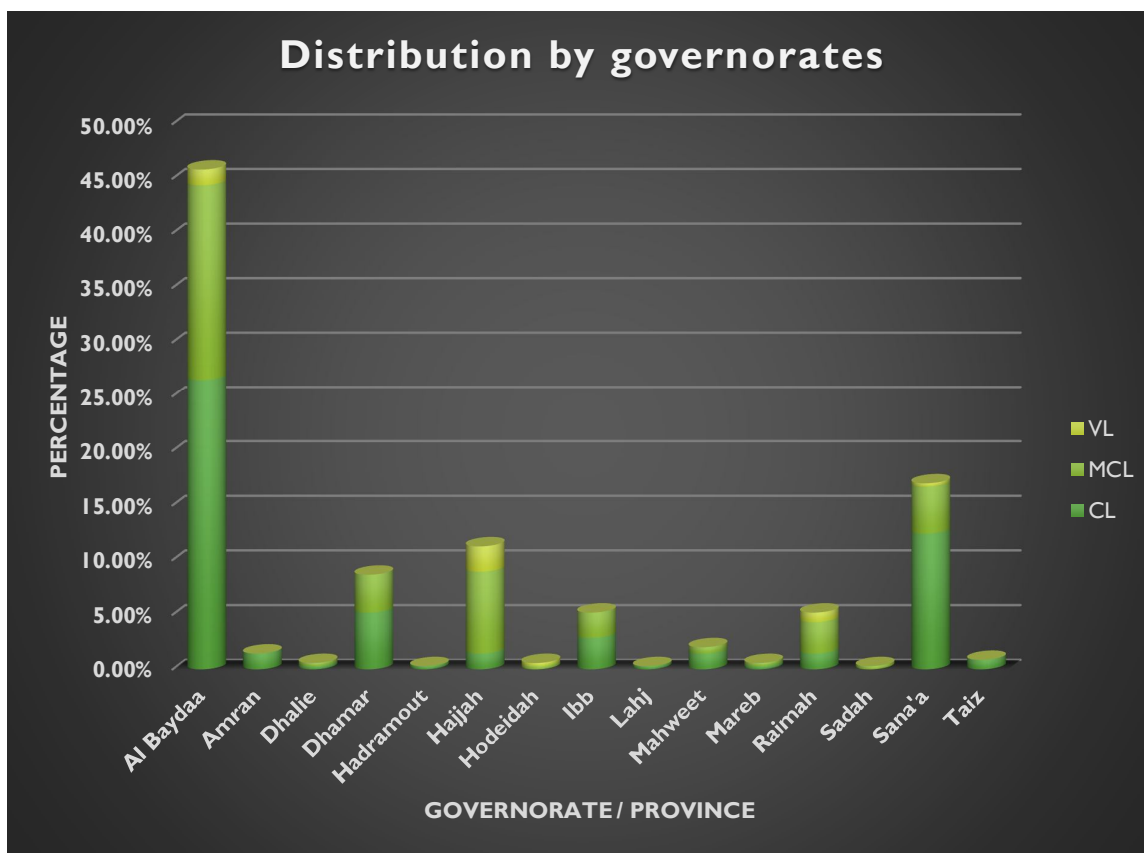

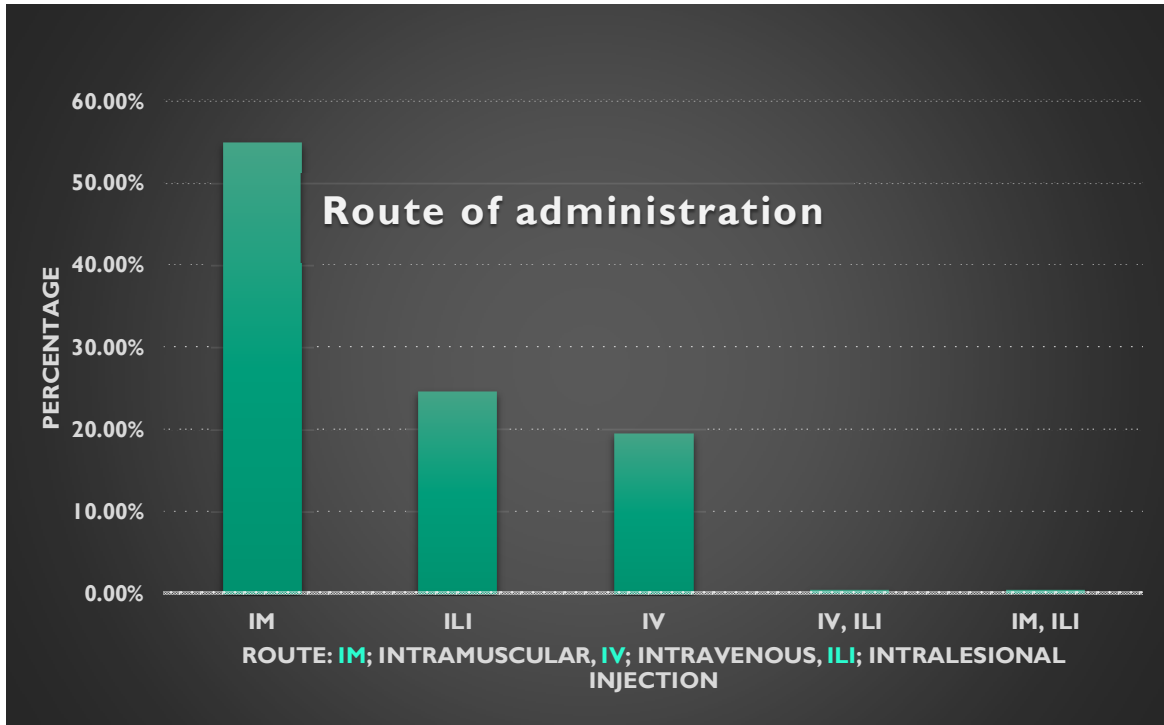

| Side Effects الأعراض الجانبية                        | No. عدد الحالات |
|------------------------------------------------------|-----------------|
| Resistance                                           | 15              |
| Allergy and Rash                                     | 6               |
| Resistance, Intolerance, Joint pain, Stiffness       | 1               |
| Resistance                                           | 1               |
| Allergy and Rash, Intolerance, Joint pain, Stiffness | 1               |
| Allergy and Rash, Resistance                         | 1               |
| <b>Grand Total المجموع</b>                           | <b>25</b>       |
| <b>Percentage النسبة المئوية</b>                     | <b>6.51 %</b>   |

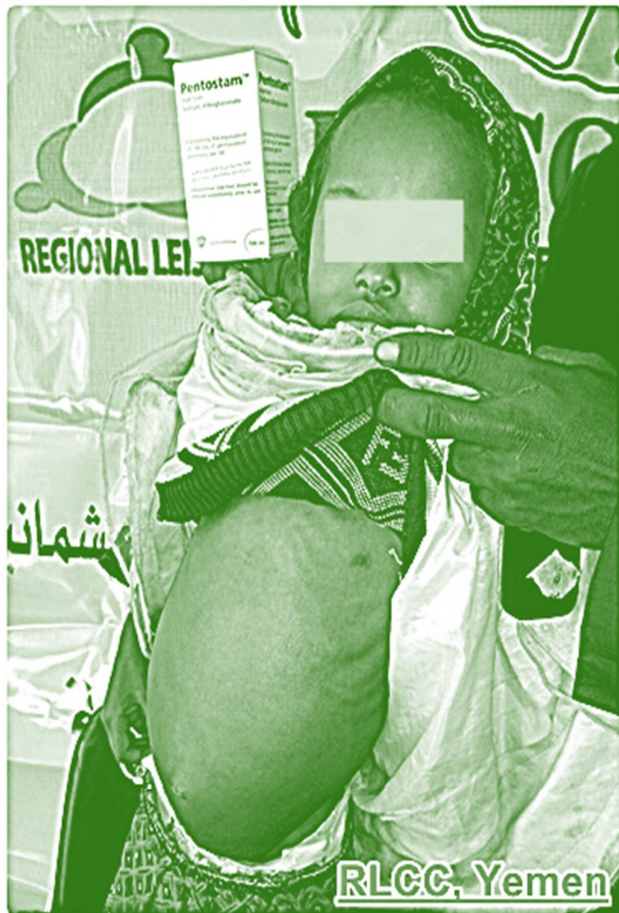

RLCC, Yemen

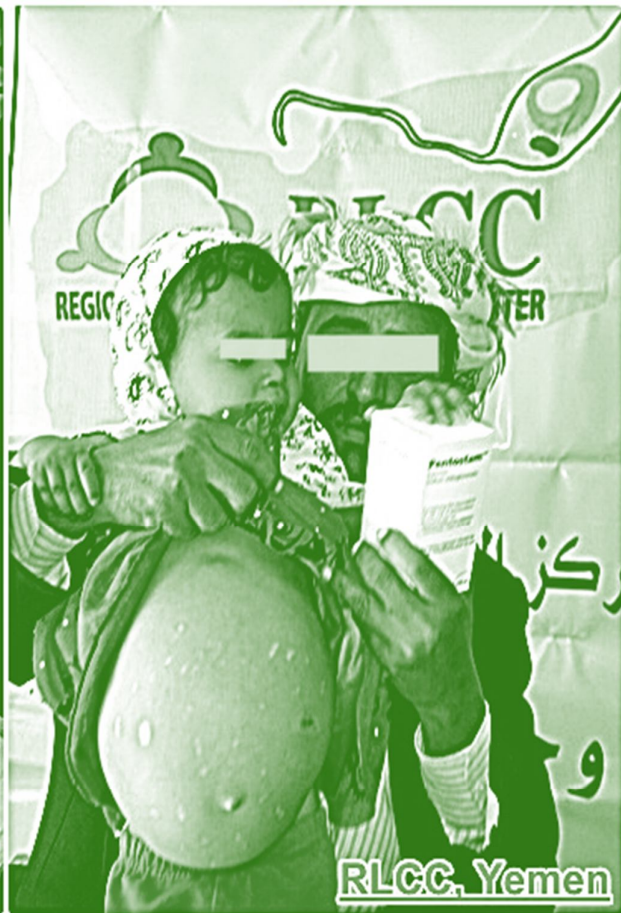

RLCC, Yemen

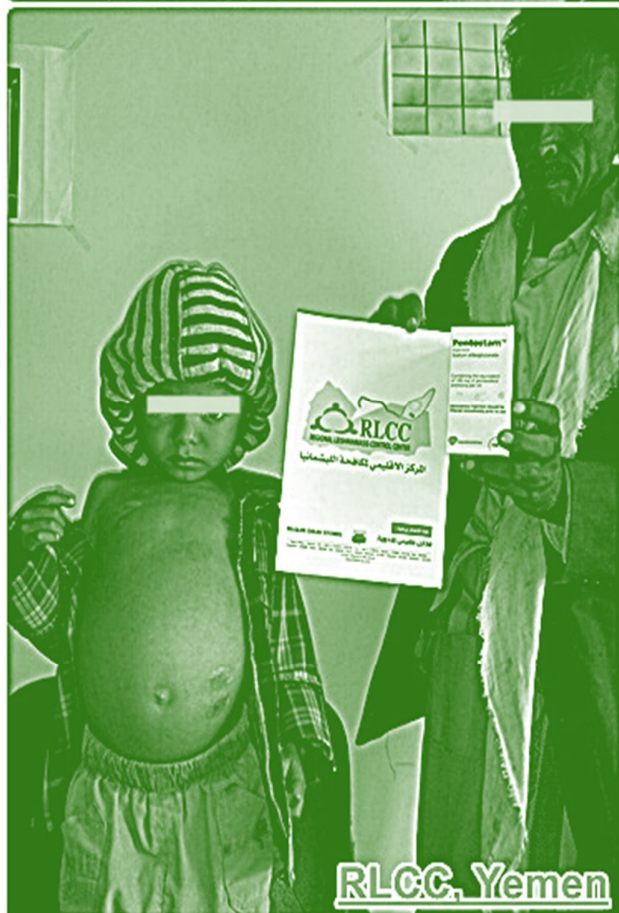

RLCC, Yemen

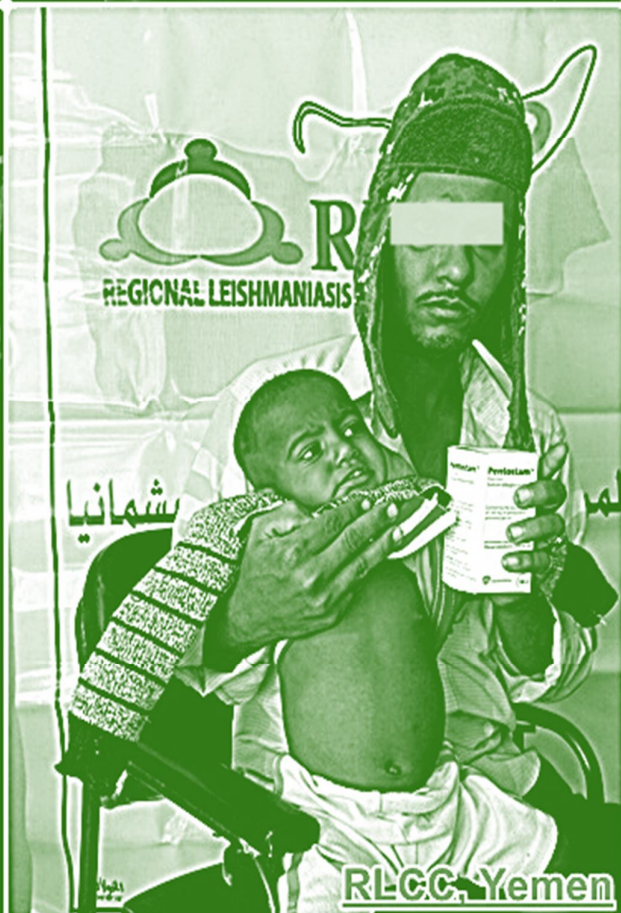

RLCC, Yemen
