# Supplementary material for: Impact of leishmaniasis in women: a practical review with an update on my ISD-supported initiative to combat leishmaniasis in Yemen (ELYP)
Source: PubMed Central journal article supplement — Int J Womens Dermatol. 2016 Jun 16;2(3):93–101. doi: 10.1016/j.ijwd.2016.04.003 (PMC5418880; doi:10.1016/j.ijwd.2016.04.003), 2016-06-16
Supplement: mmc5.pdf [file mmc5.pdf]

See page 58

## **Development of affordable molecular techniques for the diagnosis of leishmaniasis in Yemen**

Inauguraldissertation zur Erlangung der Doktorwürde  
der Naturwissenschaftlichen Fachbereiche  
Biologie, Chemie und Geowissenschaften  
im Fachbereich Biologie  
der Justus-Liebig-Universität Giessen

vorgelegt von

**Abdullatif Ali**

Master of science

Biochemisches Institut  
der Medizinischen Fakultät  
der Justus-Liebig-Universität Giessen

Giessen, Juli 2009

## ZUSAMMENFASSUNG

Die Leishmaniose ist eine durch einzellige Parasiten der Gattung *Leishmania* verursachte Infektionskrankheit, die durch den Stich von Sandmücken übertragen wird. Als erstes klinisches Symptom bildet sich eine nicht abheilende ulceröse Wunde von bis zu mehreren cm Durchmesser um die Einstichstelle herum. Nach mehreren Monaten kann die Wunde unter Hinterlassung einer Narbe spontan abheilen. Falls es sich um eine Infektion mit einer weniger virulenten Form des Parasiten gehandelt hat, ist der Patient geheilt und für den Rest des Lebens resistent gegen diese Form. Andere Stämme des Parasiten lösen aber die mucocutane Form der Krankheit aus, die zu schmerzhaften destruktiven Läsionen der Lippen- und Nasenschleimhäute führt, oder die viszerale Form der Leishmaniose, die innere Organe angreift und unbehandelt tödlich verläuft. In der Republik Jemen sind die cutane und die viszerale Leishmaniose endemisch, werden aber aus Mangel an Geld in der Bevölkerung weder hinreichend diagnostiziert noch behandelt.

Aufzeichnungen über epidemiologische Daten gibt es nur für wenige staatliche Krankenhäuser, die Zahl der unregistrierten Fälle ist wahrscheinlich sehr hoch. Um in Zukunft zu Kontrollmaßnahmen gegen die Krankheit beitragen zu können, wurde der Versuch unternommen, neue molekulare Diagnoseverfahren zu entwickeln, die einerseits sehr empfindlich und spezifisch sind, andererseits aber nicht zu kompliziert und teuer, so dass sie unter den limitierten Voraussetzungen des Landes realisiert werden können.

Um einen Einblick in das wahre Ausmaß der Krankheit im Jemen zu erhalten, wurden die in den staatlichen Krankenhäusern in den letzten Jahren gesammelten Daten ausgewertet. Außerdem wurden in verschiedenen Teilen des Landes mehr als 200 Proben von Patienten mit dem Verdacht auf cutane oder viscerale Leishmaniose gesammelt. Diese Proben wurden zunächst im Jemen mikroskopisch auf cutane Leishmaniose und mit Hilfe einer sehr unspezifischen Formol-Präzipitation-Methode auf viscerale Leishmaniose untersucht. Für einige Proben stand ein kommerzieller ELISA zur Verfügung. Von allen gesammelten Blutproben wurde die Plasmafraktion und aus angereicherten Leukozyten die DNA gewonnen und für nähere Analysen zur Universität Giessen gebracht.

Von den mittlerweile verfügbaren Sequenzdaten für die *Leishmania*-Stämme *L. infantum* (viszerale Leishmaniose) und *L. major* (cutane Leishmaniose) wurden

spezifische PCR-Primer für die Entwicklung neuer Diagnoseverfahren abgeleitet. Die neuen Verfahren wurden anhand von gereinigter DNA dieser beiden im Labor kultivierten Stämme getestet. Zur Entwicklung neuer PCR-Verfahren wurden fünf verschiedene Zielsequenzen von hoch-repetitiven Regionen der Genome ausgewählt. Zwei Genus-spezifische Tests und ein Test, der die Unterscheidung von cutaner und viszeraler Leishmaniose zulässt, wurden erfolgreich entwickelt.

Die Anwendung dieser Tests für die im Jemen gesammelten Patientenproben ergab, dass die PCR-Diagnose wesentlich empfindlicher und spezifischer ist, als die traditionell eingesetzten Methoden. Freilich konnte im Rahmen dieser Arbeit weder ein vollständiges Bild über die Epidemiologie der Leishmaniose im Jemen noch ein endgültig perfektes Diagnoseprotokoll entwickelt werden. Dies wird Aufgabe für die folgenden Jahre sein. Immerhin weisen die ermittelten Daten einerseits darauf hin, dass die Lage der Leishmaniose im Jemen sehr viel schwerwiegender ist, als offiziell zugegeben. Andererseits wurden diagnostische Verfahren entwickelt, die ausreichend einfach und so kostengünstig sind, dass sie im Land selbst eingeführt werden können. In optimierter Form könnten diese Verfahren zu einem besseren Stand der Kenntnis über diese Krankheit im Land führen und auf Dauer zu einer Verbesserung der gesundheitlichen Situation der Bevölkerung beitragen

## SUMMARY

Leishmaniasis is an infectious disease caused by different species of unicellular *Leishmania* parasites which are transmitted by the bite of sandflies. As first clinical symptom, a non-healing ulcerous wound of up to several centimeters diameter forms around the bite of the insect. After several months, the wound may heal spontaneously leaving a scar. If the infection was due to a less virulent species of the parasite, the patient is healed and resistant against this form for the rest of life. However, other strains of the parasite lead to mucocutaneous leishmaniasis which lead to painful destructions of the mucosa of lips and nose, or to visceral leishmaniasis which affects inner organs and is lethal without treatment. Cutaneous as well as visceral leishmaniasis are endemic in the Republic of Yemen, but due to limiting financial resources, the disease is neither appropriately diagnosed nor treated in the population.

Recorded epidemiological data exist only for some governmental hospitals, but the number of unregistered cases may be huge. In order to shed more light in the real extent of the disease in Yemen and to contribute to future control measures, it was attempted to design new molecular procedures for the diagnosis, which are, at the one hand, highly sensitive and specific, at the other hand not too complicated and inexpensive, so that they could be performed under the limiting conditions of the country.

To obtain some insight in the situation of leishmaniasis, the data registered in governmental hospitals during the past years were collected and evaluated. In addition, samples from more than 200 patients with suspected cutaneous and visceral leishmaniasis were collected in different parts of the country. These samples were analysed first in Yemen by microscopy for cutaneous leishmaniasis and by a highly unspecific procedure called formol gel precipitation for visceral leishmaniasis. Some of the samples were also analysed by a commercial ELISA. From all collected blood samples the plasma fraction and DNA from enriched leucocytes were prepared and transported to the University of Giessen for further analysis.

By using the available sequence data of the *Leishmania* strains *L. infantum* (visceral leishmaniasis) and *L. major* (cutaneous leishmaniasis), specific PCR primers were developed for the design of new diagnostic procedures. The assays were tested by means of purified DNA from these two strains which had been

cultivated in the laboratory. Five different target sites from highly repeated sequences of the genomes were selected to develop new diagnostic PCR assays. Two assays specific for the genus *Leishmania*, and one assay allowing differentiation of the two strains were constructed allowing to discriminate between cutaneous and visceral leishmaniasis.

Applying these tests on the patient samples collected in Yemen revealed that PCR diagnosis is more sensitive and specific than the traditional methods used. Of course, neither a comprehensive epidemiology of Yemen nor a definitive perfect diagnostic protocol could be obtained during this work. This has to be established during the following years. However, the results reveal at the one hand that the situation of leishmaniasis in Yemen is more severe than officially stated. At the other hand, diagnostic procedures were developed which are simple and inexpensive enough to be introduced in the country. When optimized, these techniques may lead to more awareness of this disease in the country and to an improvement of the health condition of the suffering population.

## CONTENT

|                                                                          |     |
|--------------------------------------------------------------------------|-----|
| ZUSAMMENFASSUNG .....                                                    | I   |
| Summary .....                                                            | III |
| CONTENT .....                                                            | V   |
| 1. INTRODUCTION .....                                                    | 1   |
| 1.1 Epidemiology of leishmaniasis .....                                  | 1   |
| 1.2 The Parasite .....                                                   | 2   |
| 1.3 Immunology of Leishmania infections .....                            | 6   |
| 1.4 Leishmaniasis and HIV-coinfection .....                              | 8   |
| 1.5 Treatment of leishmaniasis .....                                     | 9   |
| 1.6 Transmission of leishmaniasis .....                                  | 10  |
| 1.7 Introduction to Yemen .....                                          | 11  |
| 1.8 Leishmaniasis in Yemen .....                                         | 15  |
| 1.9 Diagnosis of leishmaniasis .....                                     | 15  |
| 1.10 Objective of the study .....                                        | 18  |
| 2. MATERIALS AND METHODS .....                                           | 20  |
| 2.1 Instruments .....                                                    | 20  |
| 2.2 Chemicals .....                                                      | 20  |
| 2.3 Leishmania parasites .....                                           | 21  |
| 2.4 Patient samples .....                                                | 22  |
| 2.5 DNA purification .....                                               | 23  |
| 2.6 Purification of recombinant Taq DNA polymerase .....                 | 24  |
| 2.7 Polymerase chain reaction (PCR) .....                                | 26  |
| 2.8 DNA gel electrophoresis .....                                        | 28  |
| 3. RESULTS .....                                                         | 31  |
| 3.1 Evaluation of epidemiological data on leishmaniasis in Yemen .....   | 31  |
| 3.2 Collecting samples of leishmaniasis patients in Yemen .....          | 36  |
| 3.3 Laboratory diagnosis of patient samples in Yemen .....               | 38  |
| 3.4 Establishing new procedures for the diagnosis of leishmaniasis ..... | 38  |
| 3.5 Establishing new diagnostic PCR procedures .....                     | 39  |
| 3.5.1 Kinetoplast minicircle(kDNA)-specific PCR .....                    | 41  |
| 3.5.2 18S rRNA specific PCR .....                                        | 43  |
| 3.5.3 45-basepair repeat-specific PCR .....                              | 47  |
| 3.5.4 64-basepair repeat-specific PCR .....                              | 48  |

|                                                        |    |
|--------------------------------------------------------|----|
| 3.5.5 39-basepair repeat-specific PCR .....            | 50 |
| 3.5.6 Compilation of the PCR results .....             | 53 |
| 4. DISCUSSION .....                                    | 57 |
| 4.1 Epidemiology of leishmaniasis .....                | 58 |
| 4.2 Diagnosis of leishmaniasis .....                   | 61 |
| 4.3 Collection and processing of patient samples ..... | 61 |
| 4.4 Kinetoplast DNA (kDNA)-specific PCR .....          | 62 |
| 4.5 18S ribosomal RNA-specific PCR .....               | 63 |
| 4.6 PCR assays with tandem repeat sequences .....      | 65 |
| 4.7 Concluding remarks .....                           | 66 |
| 5. REFERENCES .....                                    | 68 |
| ACKNOWLEDGEMENTS .....                                 | 77 |

# 1. INTRODUCTION

## 1.1 Epidemiology of leishmaniasis

Leishmaniasis is a protozoan parasitic disease which is prevalent in many parts of the tropics, subtropics, and Southern Europe. The disease is caused by infection with different species of *Leishmania*, which are transmitted by the bite of phlebotomine sand flies. The most common forms of leishmaniasis in the Old World are *cutaneous leishmaniasis* (CL), causing skin sores (review: Reithinger et al., 2007), and *visceral leishmaniasis* (VL), affecting internal organs of the body such as spleen, liver, and bone marrow (review: Berman, 2006). A third form of the disease, *mucocutaneous leishmaniasis* (MCL) leading to severe destruction of mucosal areas of the mouth, nose and pharynx occurs exclusively in Latin America (reviewed by Myler and Fasel, 2008). There is an estimated prevalence of approximately 12 million infected people worldwide with 1.0 - 1.5 million new cases of cutaneous leishmania and 400,000 - 600,000 new cases of visceral leishmania per year. Leishmaniasis is endemic in 88 countries and It has been estimated that 350 million people are at threat. Confirmed cases of VL have been reported from 66 countries, 90% of the world's VL occurs in five countries (India, Bangladesh, Nepal, Sudan and Brazil), and 90% of all CL cases are concentrated in 7 countries (Afghanistan, Algeria, Brazil, Iran, Peru, Saudi Arabia and Syria ) showing that Middle East is a focus for cutaneous leishmania (Kumar et al., 2007). At present 90% of all MCL occurs in Bolivia, Peru and Brazil. It is the most feared form of leishmaniasis because of its disfiguring lesions of the face.

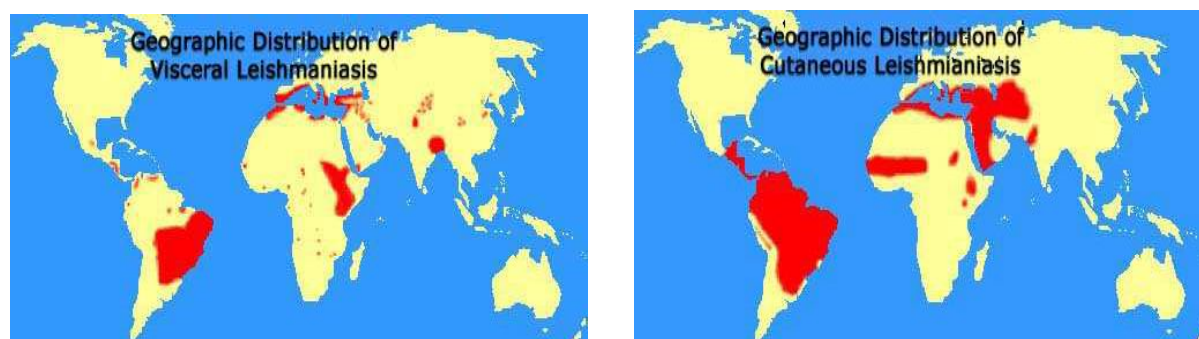

**Figure 1:** World distribution of visceral and cutaneous leishmaniasis (source: WHO)



#### 4.1 Epidemiology of leishmaniasis

There are no solid data on the incidence of *Leishmania* infections in Yemen, but the disease is certainly under-reported, especially in women and children, and may exceed 10.000 cases per year. Most cases correspond to cutaneous leishmaniasis due to infections with *L. major* and *L. tropica* which may not necessarily need treatment, but up to 10 % of the infections may be due to *L. infantum* leading to visceral leishmaniasis which is associated with up to 90% mortality when untreated.

There are only few reports on leishmaniasis in Yemen in the literature (Sarnelli 1933; Rioux 1986; Pralong et al. 1995; Khatri et al., 2006) which can be used to predict the parasite strains circulating in the country (*L. major* and *L. tropica* for cutaneous leishmaniasis and *L. infantum* for visceral leishmaniasis), but these publications do not indicate the frequency and severity of the disease in the population. In order to get more information on the occurrence of leishmaniasis, data collected during the years 2005-2008 by the the National Center of Surveillance of Disease from all governmental hospitals in the 20 governorates were analysed (Table 1). However, these data can only be used in a qualitative way, but they are by no means quantitative. Data obtained during a visit of the (private) Alolfi Hospital in the Alhodeidah governorate indicated 105 cases during the same period of time (2005-2008) in this single place which is twofold the number of cases reported by the government for the whole governate (53 cases).

The closest countries with similar kinds of *Leishmania* strains, phlebotomine vectors and comparable geographic conditions are Oman in the East, Saudi Arabia in the North-West and, in a distance of some 2000 km North-West from Yemen, Jordan and Palestine. Some useful epidemiological data exist from Saudi Arabia (al-Zahrani et al., 1989 and Ibrahim et al., 1992), whereas most informative data have been published for Jordan and Israel (Nimri et al., 2002; Wasserberg et al., 2002; Al-Jawabreh et al., 2003; Al-Jawabreh, 2005; Singer et al., 2009; Amro et al., 2009; Hamarsheh et al., 2009). These data could form a basis for the understanding of leishmaniasis in Yemen. As in Yemen, two forms of transmission of the disease exist: in urban areas the parasites are transmitted from infected individuals by the bite of phlebotomine sand flies to naïve persons (anthroponotic cutaneous leishmaniasis), whereas in rural areas animals are thought to be the reservoir (zoonotic cutaneous leishmaniasis). The anthroponotic form of disease is frequent in large cities where

many people live close together under poor hygienic conditions. The vectors can multiply in small water reservoirs close to the dwellings as illustrated by the following pictures (Figure 25).

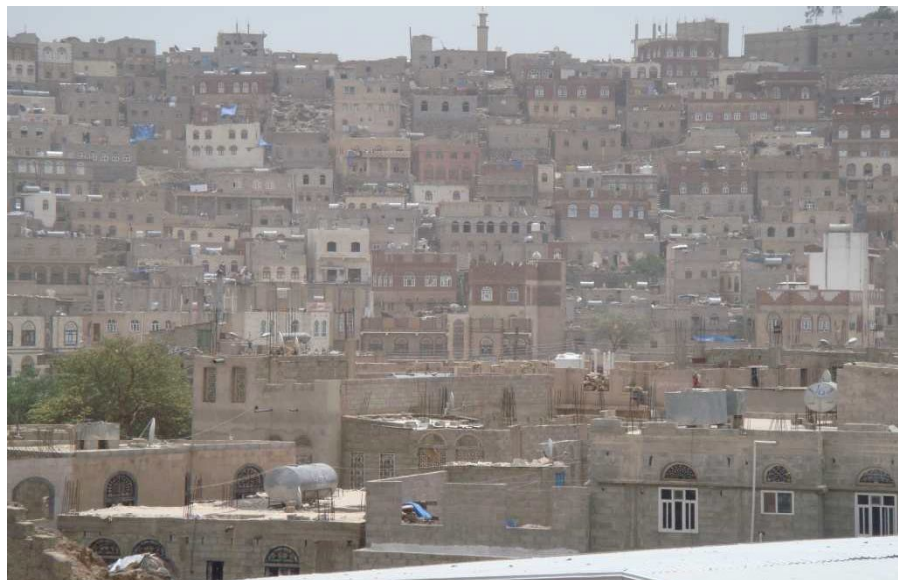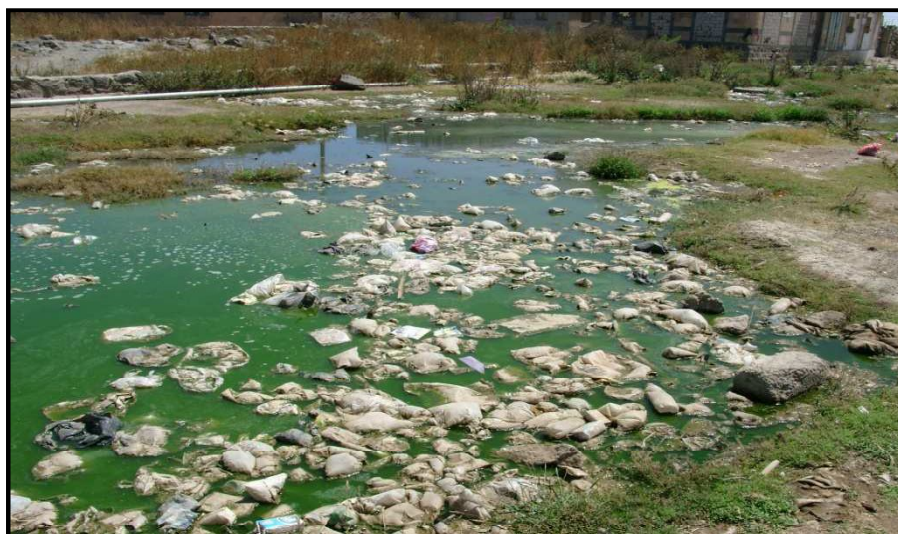

**Figure 25:** Conditions for anthroponotic cutaneous leishmaniasis. In many cities of Yemen, leishmaniasis is not dependent on animal hosts, but is transmitted by sand flies directly from infected individuals to naïve persons. In such locations the infection rate can be very high. The larvae of the sand flies can perfectly thrive in nearby water pools.

Hosts involved in the transmission of the zoonotic form of the disease include primarily dogs and small rodents living in arid regions. In the neighbouring countries Iran, Jordan and Israel host species such as *Psammomys obesus*, *Rattus rattus*, *Gerbillus dasyurus*, *Nesokia indica*, *Rhombomys opimus* and *Meriones spp.*

## REFERENCES

- Ajdary S, Alimohammadian MH, Eslami MB, Kemp K, Kharazmi A. (2000) Comparison of the immune profile of nonhealing cutaneous Leishmaniasis patients with those with active lesions and those who have recovered from infection. *Infect Immun.* 68:1760-1764.
- Alexander J, Satoskar AR and Russell DG (1999) *Leishmania* species: models of intracellular parasitism. *J Cell Science* 112:2993-3002
- Al-Jawabreh A, Barghuthy F, Schnur LF, Jacobson RL, Schönian G, Abdeen Z. (2003) Epidemiology of cutaneous leishmaniasis in the endemic area of Jericho, Palestine. *East Mediterr Health J.* 9:805-815.
- Al-Jawabreh A (2005) Molecular Epidemiology, Clinical Molecular Diagnosis and Genetic Diversity of Cutaneous Leishmaniasis in Jericho, Palestine. Dissertation at the Medical Faculty, Charité, University of Berlin
- Al-Jawabreh A, Diezmann S, Müller M, Wirth T, Schnur LF, Strelkova MV, Kovalenko DA, Razakov SA, Schwenkenbecher J, Kuhls K, and Schönian G (2008) Identification of geographically distributed sub-populations of *Leishmania (Leishmania) major* by microsatellite analysis. *BMC Evolutionary Biology* 8:183
- al-Zahrani MA, Peters W, Evans DA, Smith V, Ching Chin I. (1989) Leishmania infecting man and wild animals in Saudi Arabia. 6. Cutaneous leishmaniasis of man in the south-west. Trans R Soc Trop Med Hyg. 83:621-628.*
- Amro A, Azmi K, Schönian G, Nasereddin A, Alsharabati MB, Sawalha S, Hamarsheh O, Ereqat S, Abdeen Z. (2009) Epidemiology of paediatric visceral leishmaniasis in Hebron district, Palestine. *Trans R Soc Trop Med Hyg.* 2009 Jul;103(7):731-6. Epub 2008 Nov 20.
- Andrade BB, de Oliveira CI, Brodskyn CI, Barral A and Barral-Netto M, (2007) Role of Sand Fly Saliva in Human and Experimental Leishmaniasis: Current Insights. *Scandinavian Journal of Immunology* 66:122–127

Ashford RW , Bray MA, Hutchinson MP , and BrayRS (1973) The epidemiology of cutaneous leishmaniasis in Ethiopia. *Transactions Royal Soc Trop Med Hyg* 67:568–601.

Babaloo Z, Kaye PM, Eslami MB. (2001) Interleukin-13 in Iranian patients with visceral leishmaniasis: relationship to other Th2 and Th1 cytokines. *Trans R Soc Trop Med Hyg.* 95:85-88.

Barral A, Barral-Netto M, Almeida R, de Jesus AR, Grimaldi JG, Netto EM, Santos I, Bacellar O, Carvalho EM. (1992) Lymphadenopathy associated with *Leishmania braziliensis* cutaneous infection. *Am. J. Trop. Med. Hyg.* 47:587-592

*Bensoussan E, Nasereddin A, Jonas F, Schnur LF, Jaffe CL (2006) Comparison of PCR assays for diagnosis of cutaneous leishmaniasis. J Clin Microbiol. 44:1435-1439.*

*Boarino A, Scalone A, Gradoni L, Ferroglio E, Vitale F, Zanatta R, Giuffrida MG, Rosati S. Development of recombinant chimeric antigen expressing immunodominant B epitopes of Leishmania infantum for serodiagnosis of visceral leishmaniasis. Clin Diagn Lab Immunol. 2005 May;12(5):647-53.*

*Boyer MH (1993) Visceral leishmaniasis in Desert Storm veterans. N Engl J Med. 329:1503-1504.*

Burns, J. M., Jr., W. G. Shreffler, D. R. Benson, H. W. Ghalib, R. Badaro`, and S. G. Reed (1993) Molecular characterization of a kinesin-related antigen of *Leishmania chagasi* that detects specific antibody in African and American visceral leishmaniasis. *Proc. Natl. Acad. Sci. USA* 90:775–779.

Chang KP and McGwire GS (2002) Molecular determinants and regulation of *Leishmania* virulence. *Kinetoplastid Biology and Disease* 1:1-7, Review

Chappuis F, Mueller Y, Nguimfack A, Rwakimari JB, Couffignal S, Boelaert M, Cavaller P, Loutan L and Piola P (2005) Diagnostic Accuracy of Two rK39 Antigen-Based Dipsticks and the Formol Gel Test for Rapid Diagnosis of Visceral Leishmaniasis in Northeastern Uganda. *J. Clin. Microbiol.*43:5973–5977

Chargui N, Bastien P, Kallel K, Haouas N, Akrouf FM, Masmoudi A, Zili J, Chaker E, Othman AD, Azaiez R, Crobu L, Mezhoud H, Babba H. (2005) Usefulness of PCR in the diagnosis of cutaneous leishmaniasis in Tunisia. *Trans R Soc Trop Med Hyg.* 99:762-768.

Cruz I, Nieto J, Moreno J, Cañavate C, Desjeux P, Alvar J. (2005) Leishmania/HIV co-infections in the second decade. *Indian J Med Res.* 123:357-388. Review.

Disch J, Pedras MJ, Orsini M, Pirmez C, de Oliveira MC, Castro M, Rabello A (2005) *Leishmania (Viannia) subgenus kDNA amplification for the diagnosis of mucosal leishmaniasis. Diagn Microbiol Infect Dis.* 51:185-90.

El-Badry A, Al-Juhani A, El-Kheir I and Al-Zubiany S (2008) Distribution of sand flies in El-Nekheil province, in Al-Madinah Al-Munawwarah region, western of Saudi Arabia. *Parasitol Res* (2008) 103:151–156.

El Harith A, Slappendel RJ, Reiter I, van Knapen F, de Korte P, Huigen E, and Kolk AH (1989) Application of a direct agglutination test for detection of specific anti-Leishmania antibodies in the canine reservoir. *J Clin Microbiol.* 27:2252–2257.

Garg R and Dube A (2006) Animal models for vaccine studies for visceral leishmaniasis. *Indian J Med Res* 123:439-454. Review

Ghalib HW, Piuvezam MR, Skeiky YA, Siddig M, Hashim FA, el-Hassan AM, Russo DM, Reed SG. (1993) Interleukin 10 production correlates with pathology in human *Leishmania donovani* infections. *J Clin Invest.* 92:324-329.

Gomes AHS I, Armelin IM, Menon SZ, and Pereira-Chiocola VL (2008) *Leishmania (V.) braziliensis*: Detection by PCR in biopsies from patients with cutaneous leishmaniasis *Exp Parasitol* 119 319–324.

Hamarsheh O, Presber W, Yaghoobi-Ershadi MR, Amro A, Al-Jawabreh A, Sawalha S, Al-Lahem A, Das ML, Guernaoui S, Seridi N, Dhiman RC, Hashiguchi Y, Ghrab J, Hassan M, Schönián G. (2009) Population structure and geographical subdivision of the *Leishmania* major vector *Phlebotomus papatasi* as revealed by microsatellite variation. *Med Vet Entomol.* 23:69-77.

Harith AE, Kolk AH, Kager PA, Leeuwenburg J, Muigai R, Kiugu S, Kiugu S, Laarman JJ. (1986) A simple and economical direct agglutination test for serodiagnosis and sero-epidemiological studies of visceral leishmaniasis. *Trans R Soc Trop Med Hyg.* 80:583–536.

Heimann M (2008) Entwicklung eines ELISA zur Diagnose von viszeraler Leishmaniose. Dissertation an Fachbereich Biologie der Justus-Liebig-Universität Gessen

Henk DF, Schallig H and Oskam L. (2002) Molecular biological applications in the diagnosis and control of leishmaniasis and parasite identification. *Tropical Medicine and International Health*, 7:641–651. Review

*Ibrahim EA, al-Zahrani MA, al-Tuwaigri AS, al-Shammary FJ, Evans DA (1992) Leishmania infecting man and wild animals in Saudi Arabia. 9. The black rat (Rattus rattus) a probable reservoir of visceral leishmaniasis in Gizan province, south-west Saudi Arabia. Trans R Soc Trop Med Hyg. 86:513-514.*

Jaffe CL, Baneth G, Abdeen ZA, Schlein Y and Warburg A (2004) Leishmaniasis in Israel and the Palestinian Authority. *Trends Parasitol* 20:151-154.

Jensen, A. T., S. Gasim, T. Moller, A. Ismail, A. Gaafar, M. Kemp, A. M. el Hassan, A. Kharazmi, T. G. Theander, and K. Andersen. 1999. Serodiagnosis of *Leishmania donovani* infections: assessment of enzyme-linked immunosorbent assays using recombinant *L. donovani* gene B protein (GBP) and a peptide sequence of *L. donovani* GBP. *Trans. R. Soc. Trop. Med. Hyg.* 93:157–160.

Khatri ML, Haider N, Di Muccio T, and Gramiccia M (2006) Cutaneous leishmaniasis in Yemen: clinicoepidemiologic features and a preliminary report on species identification. *Int J Dermatol* 45:40–45.

Kumar, R., K. Pai, K. Pathak, and S. Sundar. 2001. Enzyme-linked immunosorbent assay for recombinant K39 antigen in diagnosis and prognosis of Indian visceral leishmaniasis. *Clin. Diagn. Lab. Immunol.* 8:1220–1224.

Kumar R, Bumb RA, Ansari NA, Mehta RD, and Salotra P. 2007. Cutaneous leishmaniasis caused by *Leishmania tropica* in Bikaner, India: parasite identification

and characterization using molecular and immunologic tools. *Am. J. Trop. Med. Hyg.* 76:896-901.

Kurtzhals JA, Hey AS, Jardim A, Kemp M, Schaefer KU, Odera EO, Christensen CB, Githure JI, Olafson RW, Theander TG, (1994) Dichotomy of the human T cell response to *Leishmania* antigens. II. Absent or Th2-like response to gp63 and Th1-like response to lipophosphoglycan-associated protein in cells from cured visceral leishmaniasis patients. *Clin Exp Immunol.*96:416-421.

*Lachaud L, Marchergui-Hammami S, Chabbert E, Dereure J, Dedet JP, Bastien P. (2002) Comparison of six PCR methods using peripheral blood for detection of canine visceral leishmaniasis. J Clin Microbiol. 40:210-215.*

Maalej, I. A., M. Chenik, H. Louzir, S. A. Ben Salah, C. Bahloul, F. Amri, and K. Dellagi. 2003. Comparative evaluation of ELISAs based on ten recombinant or purified *Leishmania* antigens for the serodiagnosis of Mediterranean visceral leishmaniasis. *Am. J. Trop. Med. Hyg.* 68:312–320.

Markle WH and Makhoul K. (2004) Cutaneous leishmaniasis: recognition and treatment. *American Family Physician* 69:1455-1460.

Montenegro J. (1926) Cutaneous reaction in leishmaniasis. *Arch Derm Syph*; 13: 187-94.

*Mosleh IM, Geith E, Natsheh L, Abdul-Dayem M, Abotteen N. (2008) Cutaneous leishmaniasis in the Jordanian side of the Jordan Valley: severe under-reporting and consequences on public health management. Trop Med Int Health. 13:855-60.*

Myint CK, Asato Y, Yamamoto Y, Kato H, Bhutto AM, Soomro FR, Memon MZ, Matsumoto J, Marco JD, Oshiro M, Katakura K, Hashiguchi Y, and Uezato H (2008) Polymorphisms of cytochrome b gene in *Leishmania* parasites and their relation to types of cutaneous leishmaniasis lesions in Pakistan. *The Journal of Dermatology* 35:76-85.

Myler P and Fasel N. (2008). *Leishmania: After The Genome*. Caister Academic Press. ISBN 978-1-904455-28-8

Naderer T and McConville MJ (2008) The Leishmania–macrophage interaction: a metabolic perspective. *Cellular Microbiology* 10:301–308.

*Nasereddin A, Ereqat S, Azmi K, Baneth G, Jaffe CL, Abdeen Z. (2006) Serological survey with PCR validation for canine visceral leishmaniasis in northern Palestine. J Parasitol. 92:178-183.*

*Nasereddin A, Azmi K, Jaffe CL, Ereqat S, Amro A, Sawalhah S, Baneth G, Schönian G, Abdeen Z (2009) Kinetoplast DNA heterogeneity among Leishmania infantum strains in central Israel and Palestine. Vet Parasitol. 161:126-130.*

Nimri L, Soubani R and Marina Gramiccia M (2002) Leishmania species and zymodemes isolated from endemic areas of cutaneous leishmaniasis in Jordan. *Kinetoplastid Biology and Disease* 1:7

*Piarroux R, Fontes M, Perasso R, Gambarelli F, Joblet C, Dumon H, Quilici M (1995) Phylogenetic relationships between Old World Leishmania strains revealed by analysis of a repetitive DNA sequence. Mol Biochem Parasitol. 73:249-252.*

Pourahmad M, Farhang Hooshmand F, and Masood Rahiminejad M (2009) Cutaneous leishmaniasis associated with visceral leishmaniasis in a case of acquired immunodeficiency syndrome (AIDS). *Intern J Dermatol* 48, 59–61

*Pourmohammadi B, Motazedian MH, Kalantari M (2008) Rodent infection with Leishmania in a new focus of human cutaneous leishmaniasis, in northern Iran. Ann Trop Med Parasitol. 102:127-133.*

Pratlong F, Bastien P, Perello R, Lami P and Dedet IP (1995) Human cutaneous leishmaniasis caused by *Leishmania donovani* sensu strictu in Yemen. –*Trans Royal Soc Trop Med Hyg* 89:398-399

Ramaoui K, Guernaoui S and Boumezzough A (2008) Entomological and epidemiological study of a new focus of cutaneous leishmaniasis in Morocco. *Parasitol Res* 103:859–863.

Reithinger R, Dujardin JC, Louzir H, Pirmez C, Alexander B, Brooker S (2007) Cutaneous leishmaniasis. *Lancet Infect Dis* 7:581–596, Review



Reithinger R and Dujardin JC (2007) Molecular Diagnosis of Leishmaniasis: Current Status and Future Applications. *J Clin Microbiol* 45:21–25

Rey JR (2007) Document ENY-738 (IN705) of the Entomology and Nematology Department, Florida Cooperative Extension Service, Institute of Food and Agricultural Sciences, University of Florida. <http://edis.ifas.ufl.edu/pdffiles/IN/IN70500.pdf>

Rioux JA, Daoud W, Pratlong F, Rioux JA, Daoud W and Pratlong F (1986) Les complexes *Leishmania donovani* sst. *Leishmania tropica* et *Leishmania major* en Republique Arabe du Yemen. In: Rioux JA, ed. *Leishmania: Taxonomie-Phylogenesse*. Montpellier: Institut National de la Sante et de la Recherche Medicale, 1986: 357–363.

Roberts MTM. (2006). Current understandings on the immunology of leishmaniasis and recent developments in prevention and treatment *British Medical Bulletin* 2006; 75 and 76:115–130

*Romero GA, Noronha EF, Pirmez C, Pires Fdo E, Fernandes O, Nehme NS, Cupolillo E, Firoozmand L, da Graça GC, Volpini A, Santos SL, Romanha AJ. (2008) Sensitivity and reproducibility of a PCR assay for Leishmania detection using skin biopsy imprints on filter paper. Acta Trop. 109:74-7.*

Sadeghian G, Momeni A, Siadat AH, Usefi P (2006) Evaluation of leishmanin skin test and its relationship with the clinical form and duration of cutaneous leishmaniasis. *Dermatology Online Journal* 12:3.

Salotra P, Sreenivas G, Beena KR, Mukherjee A and Ramesh V (2003) Parasite detection in patients with post kala-azar dermal leishmaniasis in India: a comparison between molecular and immunological methods. *J Clin Pathol* 56:840–843.

Sang DK, Okelo GBA, Ndegwa CW, Ashford RW (1993) New foci of cutaneous leishmaniasis in central Kenya and the Rift Valley. *Trans R Soc Trop Med Hyg* 87:629–632.

Sarnelli T (1933) Presenza di leishmaniosi muco-cutanee sugli altipiani dell'arabia sudoccidentale. *Arch Italiano Scienze Med Coloniali*;14:227–228.

Schallig HDFH and Oskam L. (2002) Molecular biological applications in the diagnosis and control of leishmaniasis and parasite identification. *Tropical Medicine and International Health* 7:641–651.

*Schönian G, Nasereddin A, Dinse N, Schweynoch C, Schallig HD, Presber W, Jaffe CL (2003) PCR diagnosis and characterization of Leishmania in local and imported clinical samples. Diagn Microbiol Infect Dis. 47:349-358.*

Singer SR, Abramson N, Shoob H, Zaken O, Zentner G, and Stein-Zamir C (2008) Ecoepidemiology of Cutaneous Leishmaniasis Outbreak, Israel. *Emerging Infectious Diseases* 14:1424-1426.

Singh N, Curran MD, Middleton D, Rastogi AK (1999) Characterization of kinetoplast DNA minicircles of an Indian isolate of *Leishmania donovani*. *Acta Tropica* 73:313–319.

Singh S (2006) New developments in diagnosis of leishmaniasis. *Indian J Med Res* 123: 311-330, Review

*Spanakos G, Patsoula E, Kremastinou T, Saroglou G, Vakalis N.(2002) Development of a PCR-based method for diagnosis of Leishmania in blood samples. Mol Cell Probes. 16:415-420.*

*Sundar S, Reed SG, Sharma S, Mehrotra A, Murray HW. (1997) Circulating T helper 1 (Th1) cell- and Th2 cell-associated cytokines in Indian patients with visceral leishmaniasis. Am J Trop Med Hyg. 56:522-525.*

*Svobodova M, Votypka J, Peckova J, Dvorak V, Nasereddin A, Baneth G, Sztern J, Kravchenko V, Orr A, Meir D, Schnur LF, Volf P, Warburg A (2006) Distinct transmission cycles of Leishmania tropica in 2 adjacent foci, Northern Israel. Emerg Infect Dis 12:1860-1868.*

Van Eys G, Schoone GJ, Croon NCM, Ebeling SB, 1992. Sequence analysis of small subunit ribosomal RNA genes and its use for detection and identification of *Leishmania* parasites. *Mol Biochem Parasitol* 51: 133–142.

*Villalba E, Ramírez JL (1982) Ribosomal DNA of Leishmania brasiliensis: number of ribosomal copies and gene isolation. J Protozool. 29:438-441.*

von Stebut E (2007) Cutaneous Leishmania infection: progress in pathogenesis research and experimental therapy. *Experimental Dermatology* 16:340–346.

Wasserberg G, Abramskya Z, Anders G, El-Faric M, Schoenianc G, Schnur L, Kotlerd BP, Kabaloe I, Warburg A (2002) The ecology of cutaneous leishmaniasis in Nizzana, Israel: infection patterns in the reservoir host, and epidemiological implications. *Internat J Parasitol* 32:133–143.

*Wortmann G, Sweeney C, Hounq HS, Aronson N, Stiteler J, Jackson J, Ockenhouse C (2001) Rapid diagnosis of leishmaniasis by fluorogenic polymerase chain reaction. Am J Trop Med Hyg. 2001 Nov;65:583-587.*

## **EIDESSTATTLICHE ERKLÄRUNG**

Ich habe die vorgelegte Dissertation selbständig und ohne unerlaubte fremde Hilfe und nur mit den Hilfen angefertigt, die ich in der Dissertation angegeben habe. Alle Textstellen, die wörtlich oder sinngemäß aus veröffentlichten Schriften entnommen sind, und alle Angaben, die auf mündlichen Auskünften beruhen, sind als solche kenntlich gemacht. Bei den von mir durchgeführten und in der Dissertation erwähnten Untersuchungen habe ich die Grundsätze guter wissenschaftlicher Praxis, wie sie in der „Satzung der Justus-Liebig-Universität Gießen zur Sicherung guter wissenschaftlicher Praxis“ niedergelegt sind, eingehalten

Giessen im Juli 2009

Abdullatif Ali
